# Supplementary material for: Cathepsin B, H and L inhibitors as cell proliferating agents: design, synthesis, computational and pharmacological studies of some novel 2-(2-naphthoyl)-6,6-dimethyl-3-aryl-2,3,6,7-tetrahydrobenzofuran-4(5H)-ones
Source: Royal Society of Chemistry journal article supplement (doi:10.1039/c6ra06480a), 2016-01-01
Supplement: c6ra06480a1.pdf [file c6ra06480a1.pdf]

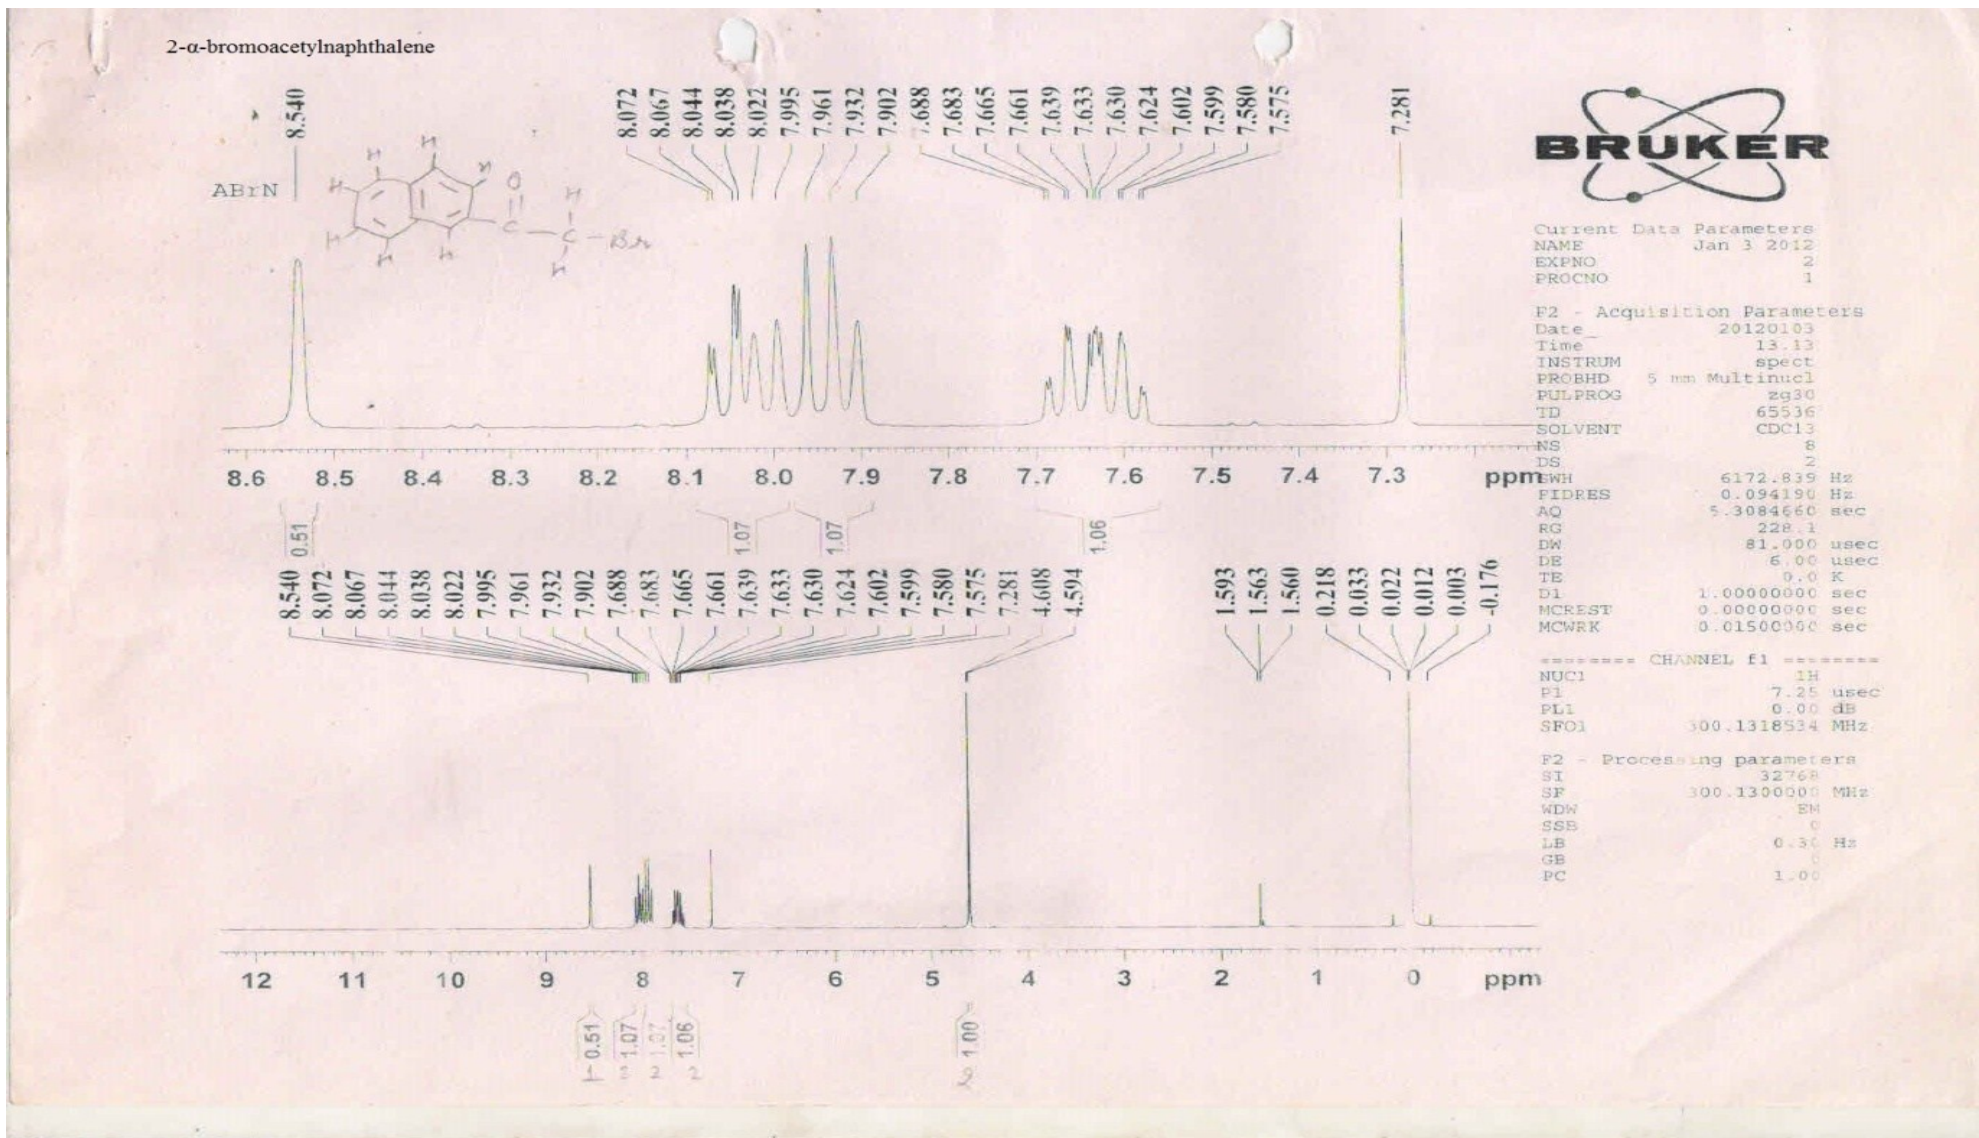

2-Bromo acetyl naphthalene

2- $\alpha$ -bromoacetylnaphthalene

12:55:23 PM 1/16/2012

Operator: <Manjeet Saini>  
Department: <Chemistry>

ABB

TITLE: Sample ABRN =2095 2012-01-16 12h53m55s

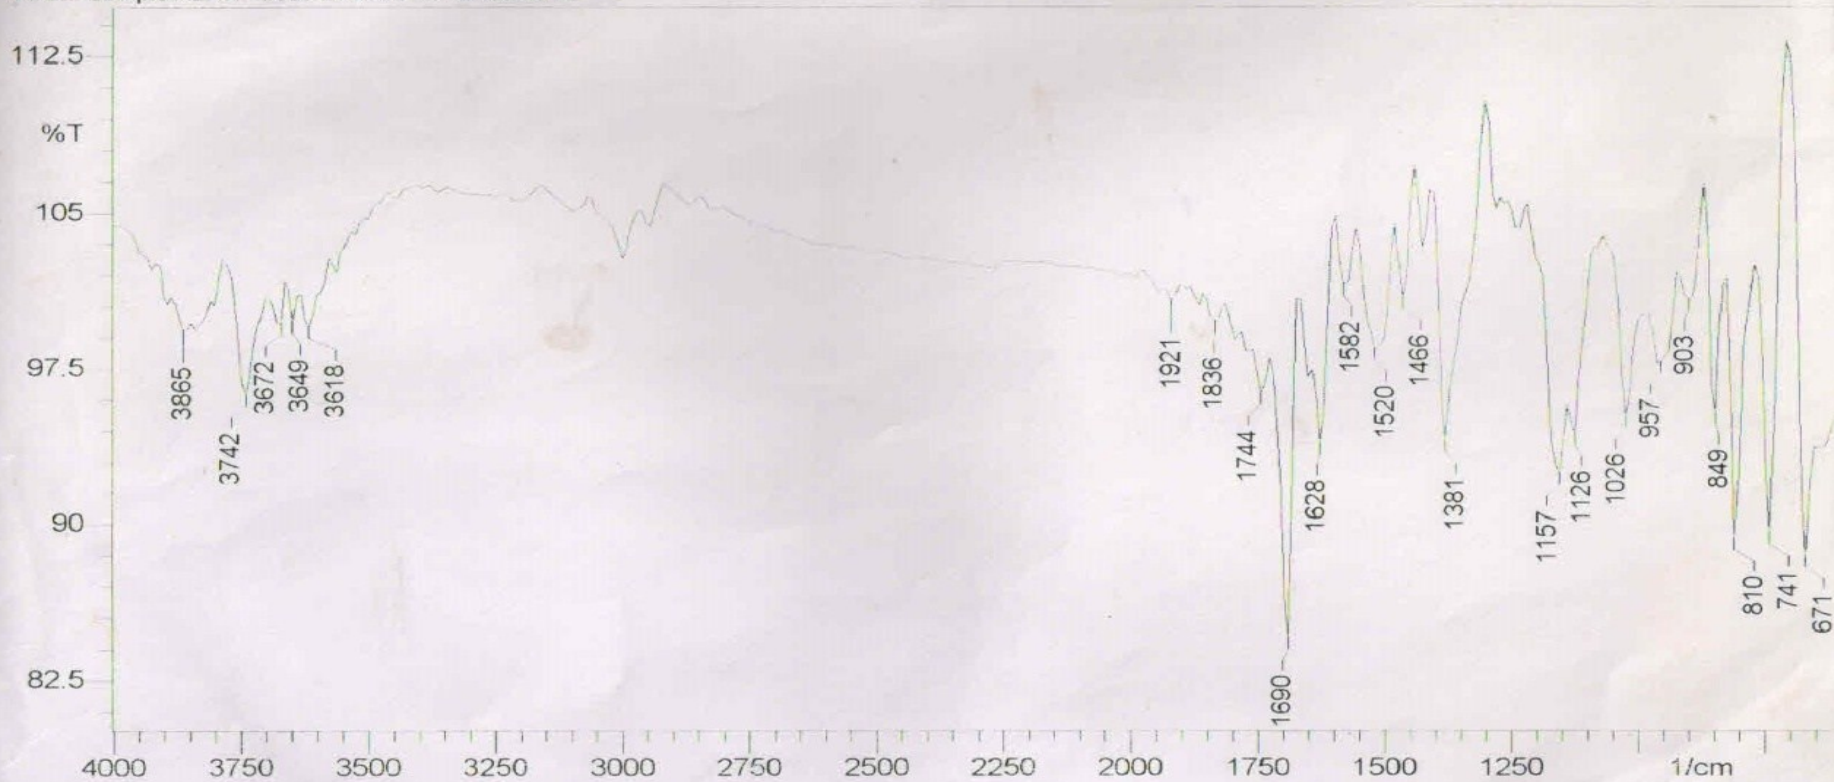

*M. Saini*  
1/16/2012

1a

07-02

3:02:11 PM 9/6/2011

Operator: MANJEET SAINI  
Department: CHEMISTRY

ABB

TITLE: SD -5 =2011-09-06 15h00m04s

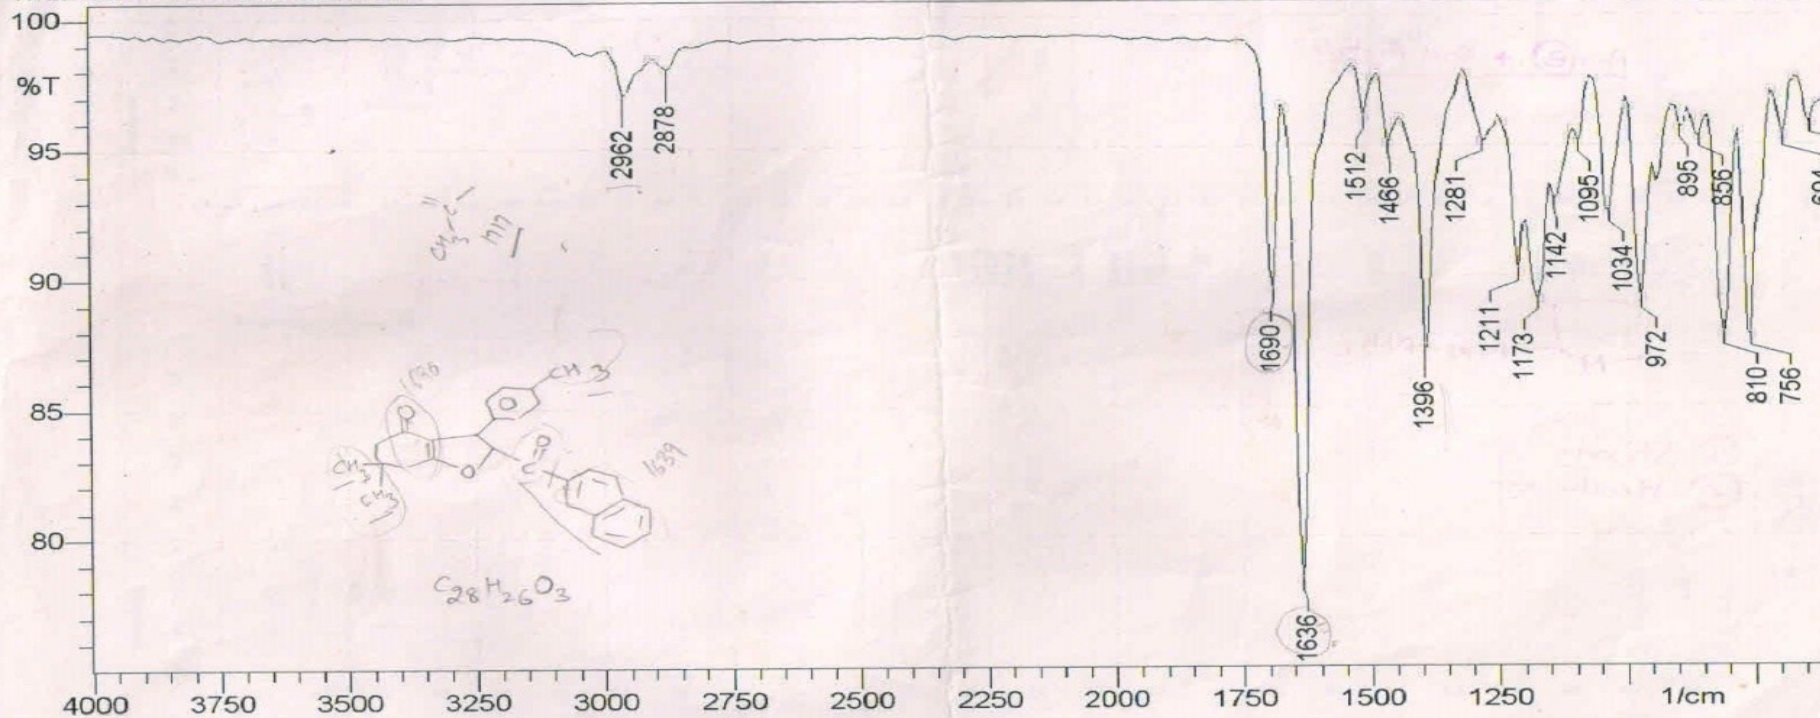

*M. Saini*  
5/9/2011

SD-5 1a

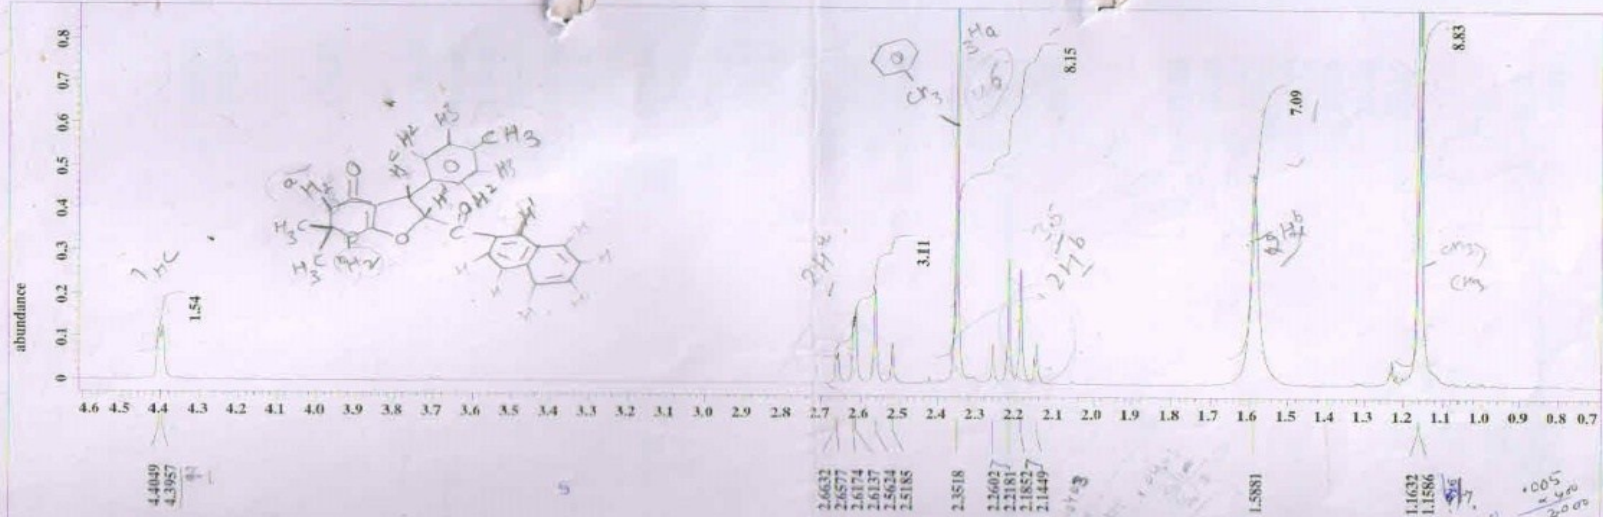

X : parts per Million : 1H

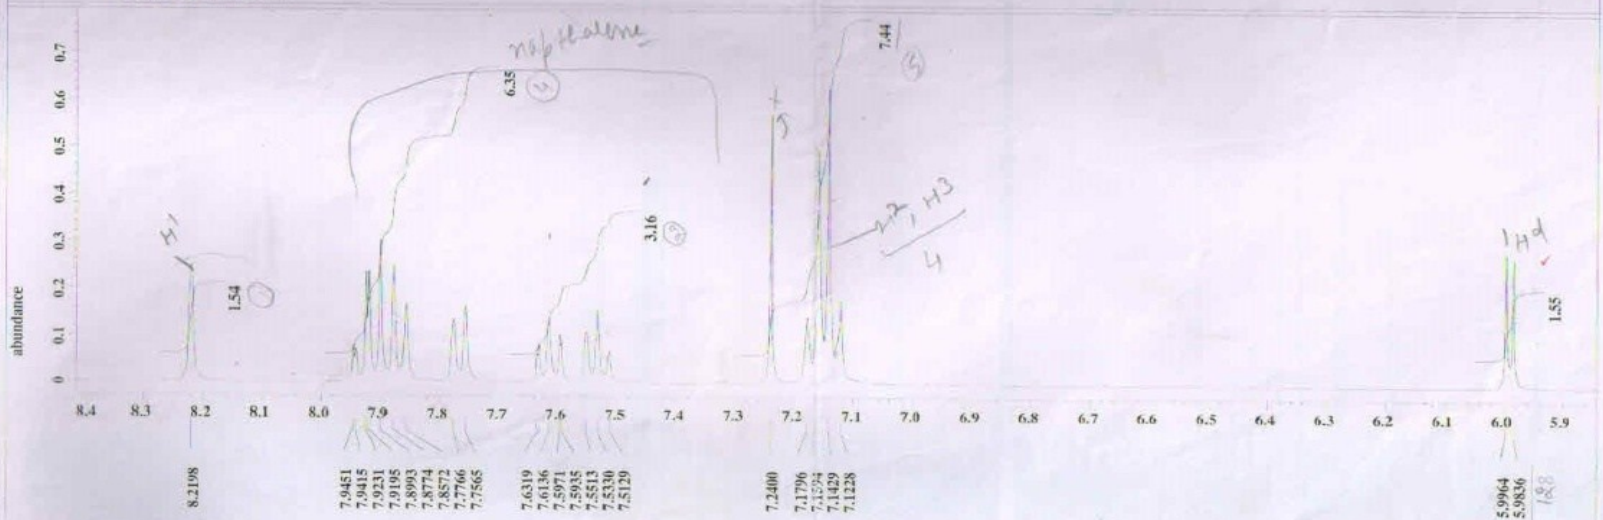

X : parts per Million : 1H

0.0046  
4.00  
184.00

1632  
1596  
3722  
2  
1.611

1a

SD-5

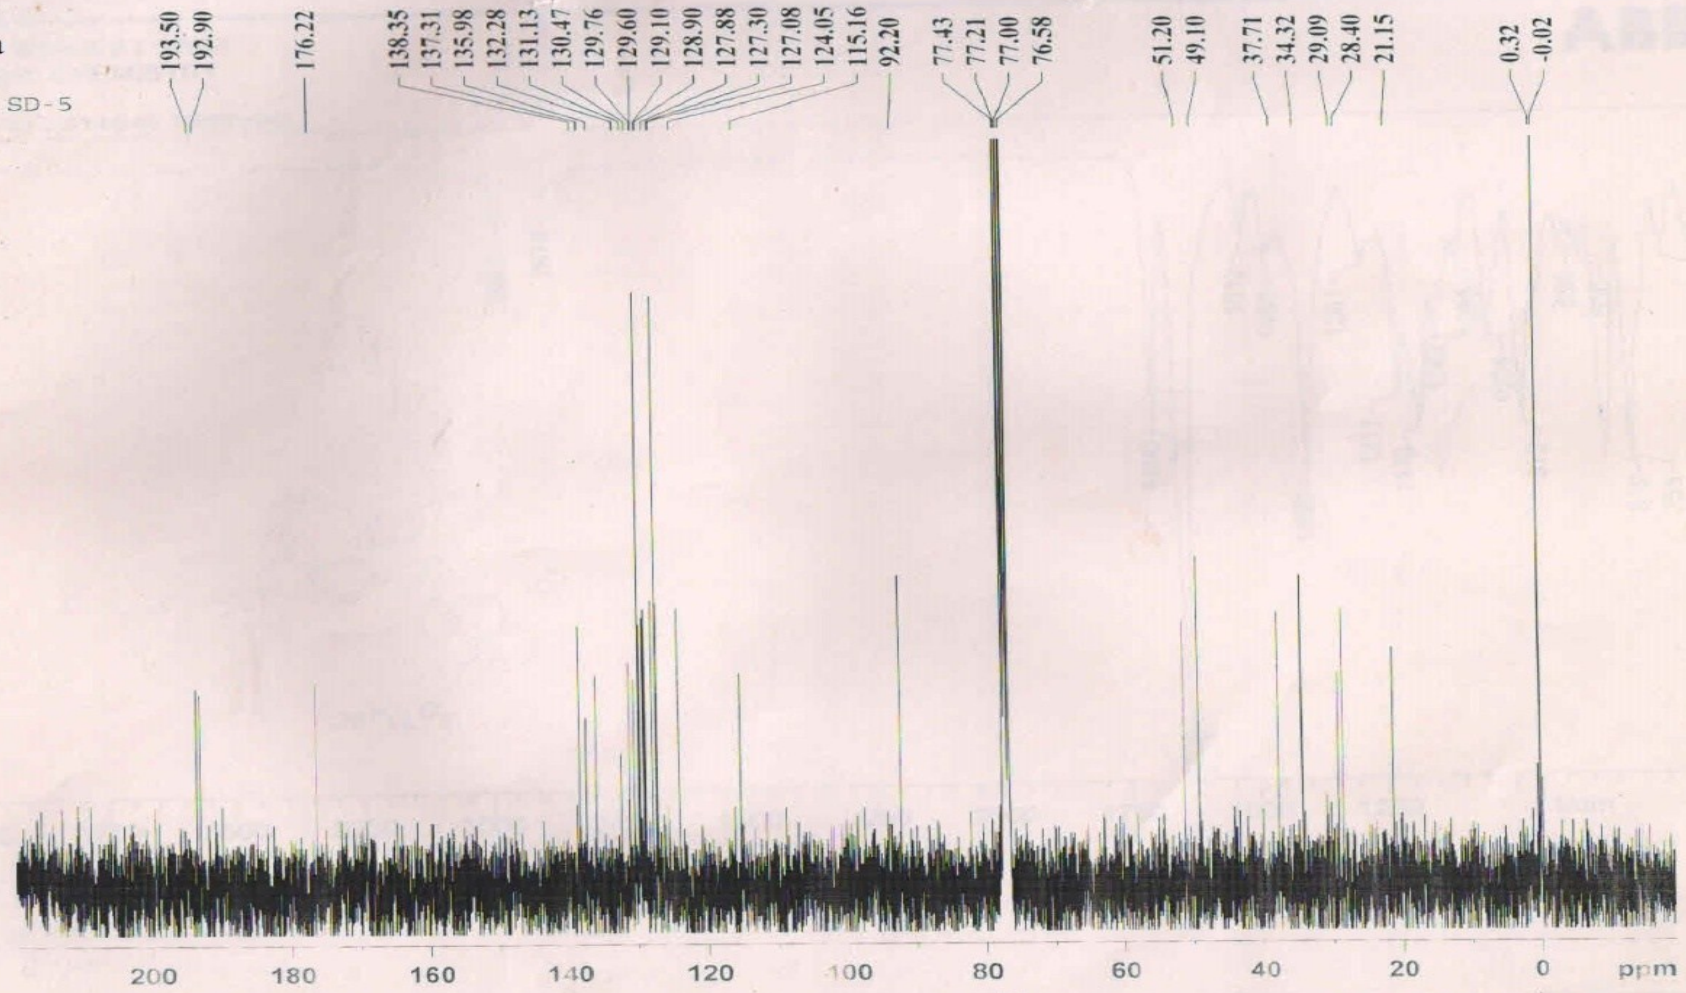

1b

10:11.24 AM 1/17/2012

Operator: <Manjeet Saini>  
Department: <Chemistry>

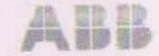

TITLE: Sample -SD -12 =S2012-01-17 10h09m18s

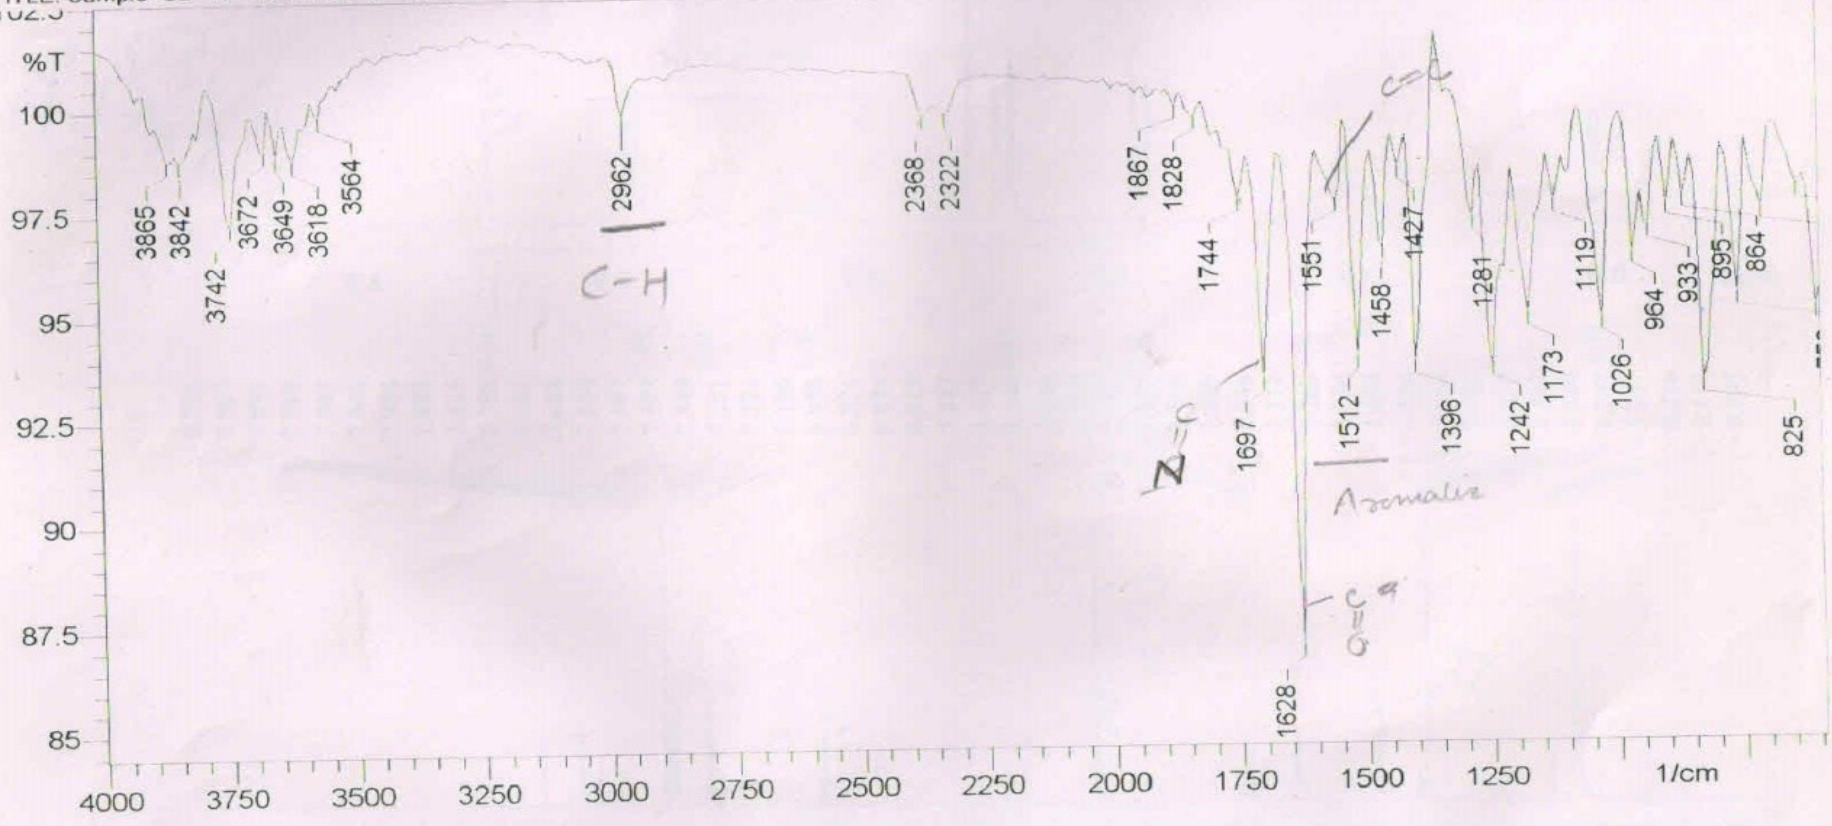

*Manjeet Saini*  
17/1/2012

1b

SD-12

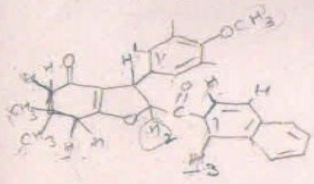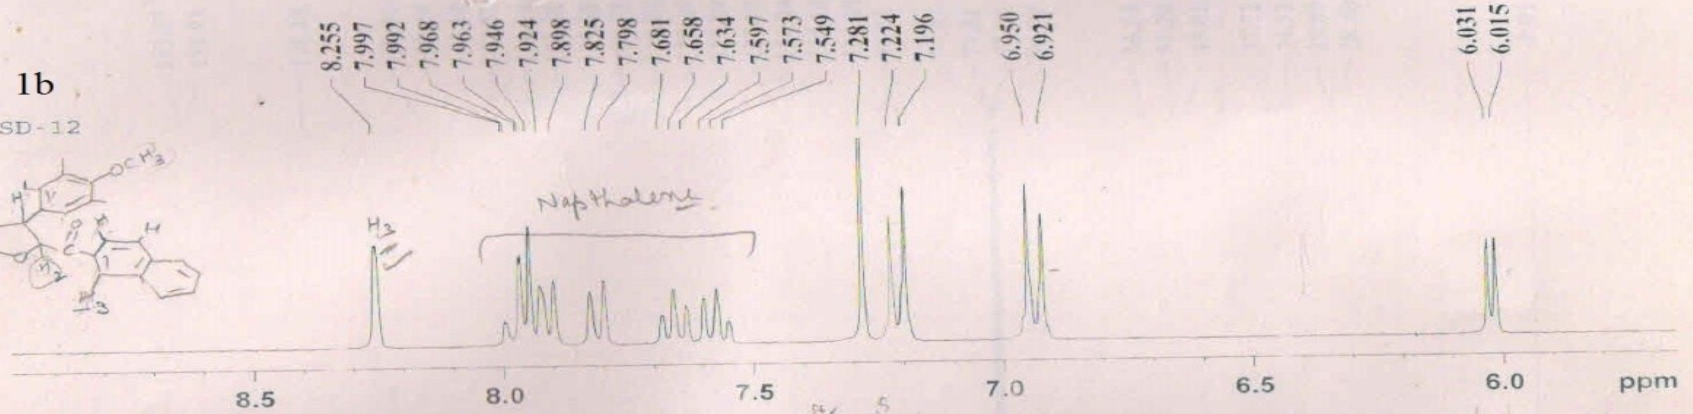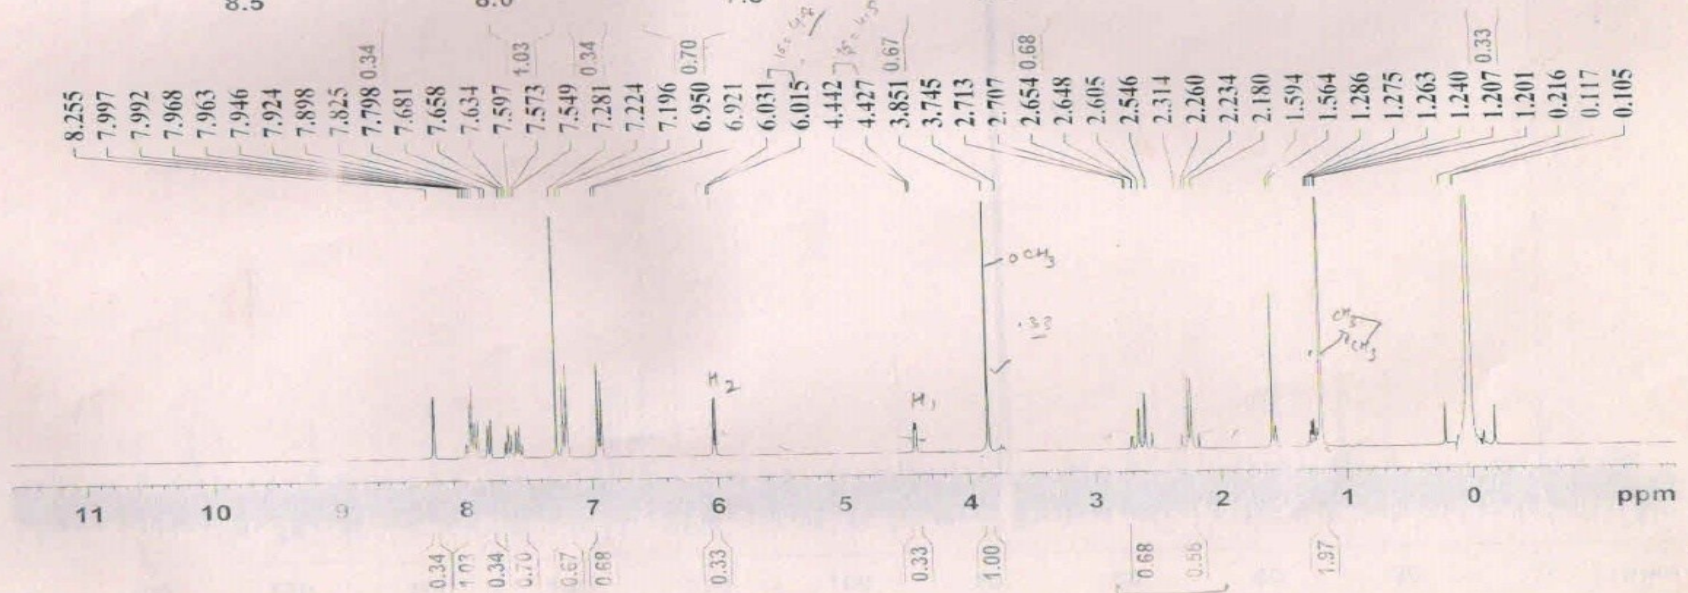

1b

SD-12

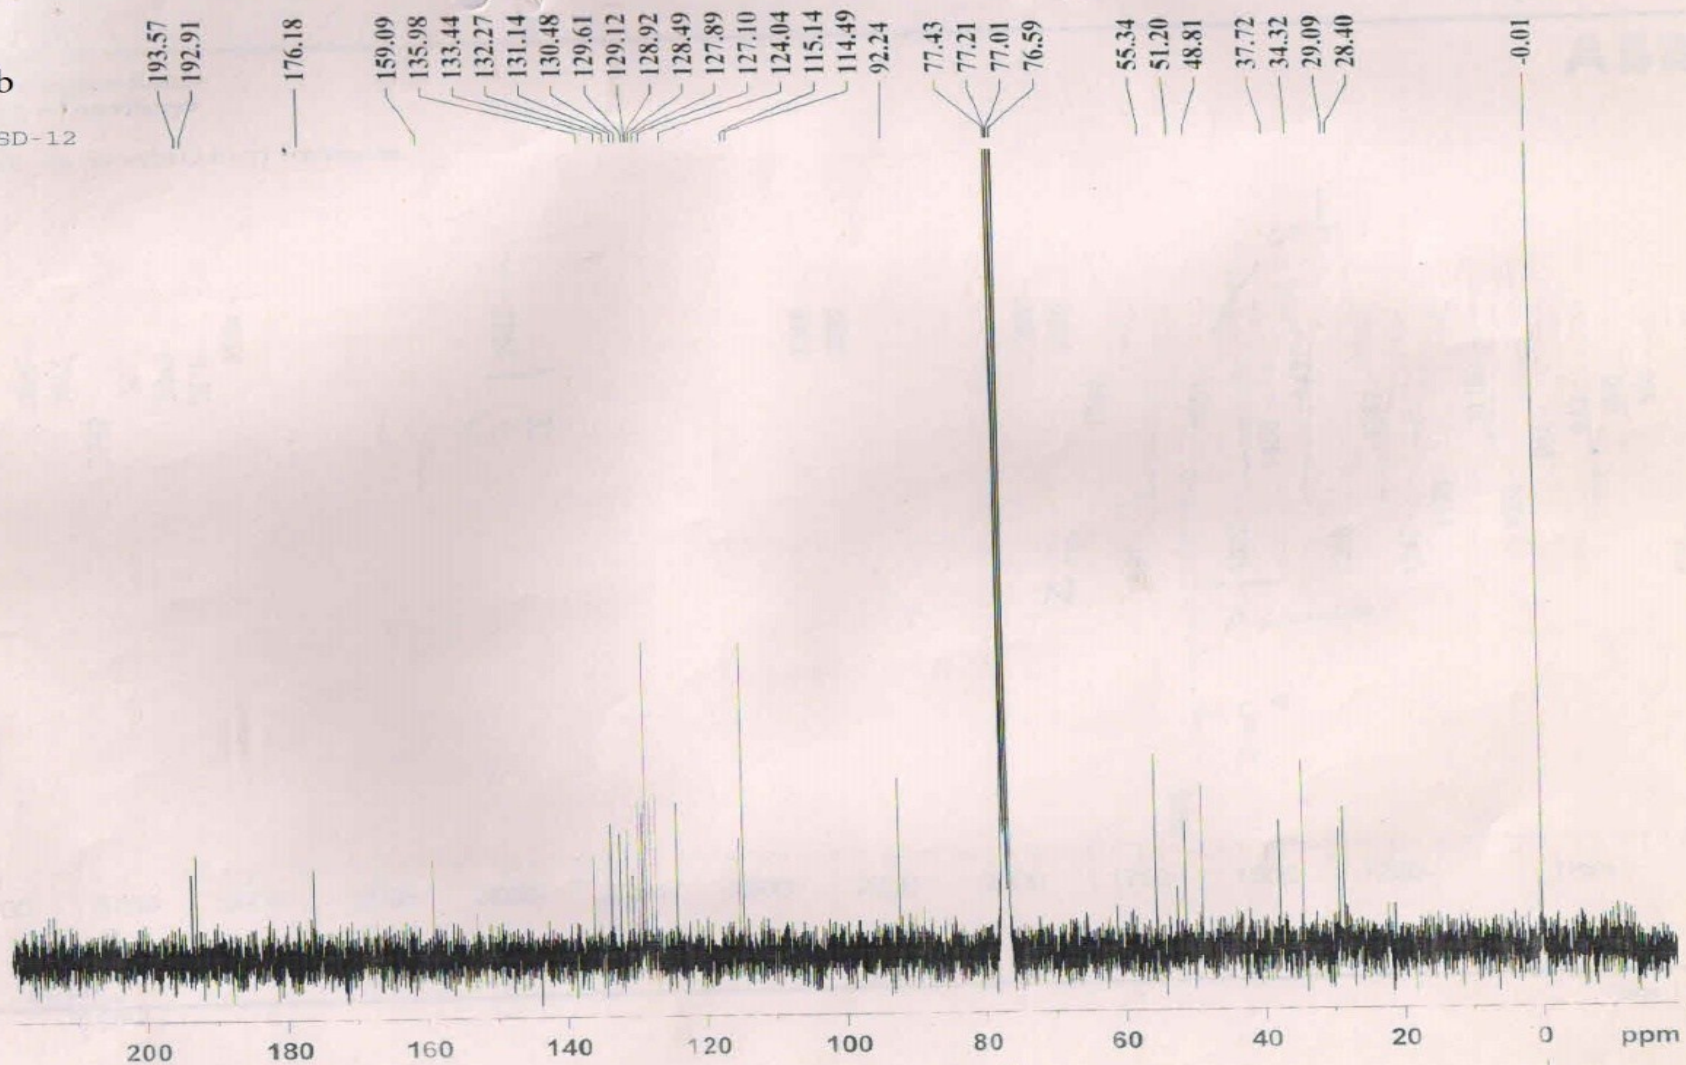



Ic

*l. Bromo acetyl nap + amiline*

1:16:03 PM 1/5/2012

Operator: <Manjeet Saini>  
Department: <Chemistry>

**ABB**

TITLE: SampleSD -13 =2012-01-05 13h15m09s

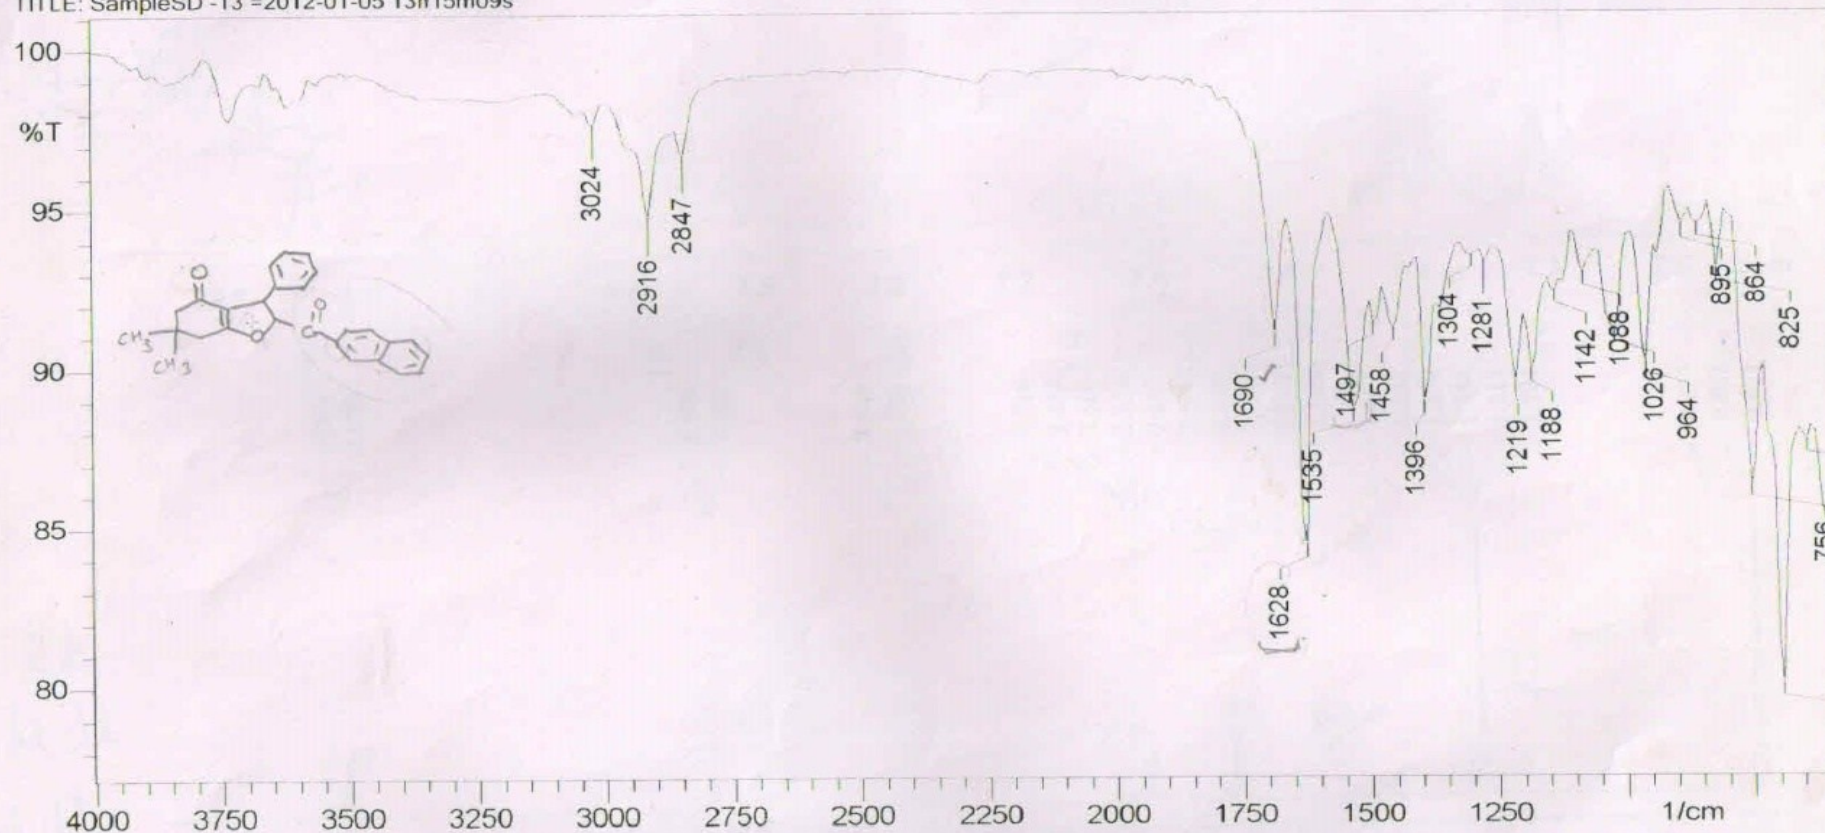

*Manjeet Saini*  
5/1/2012



1c

SD-13

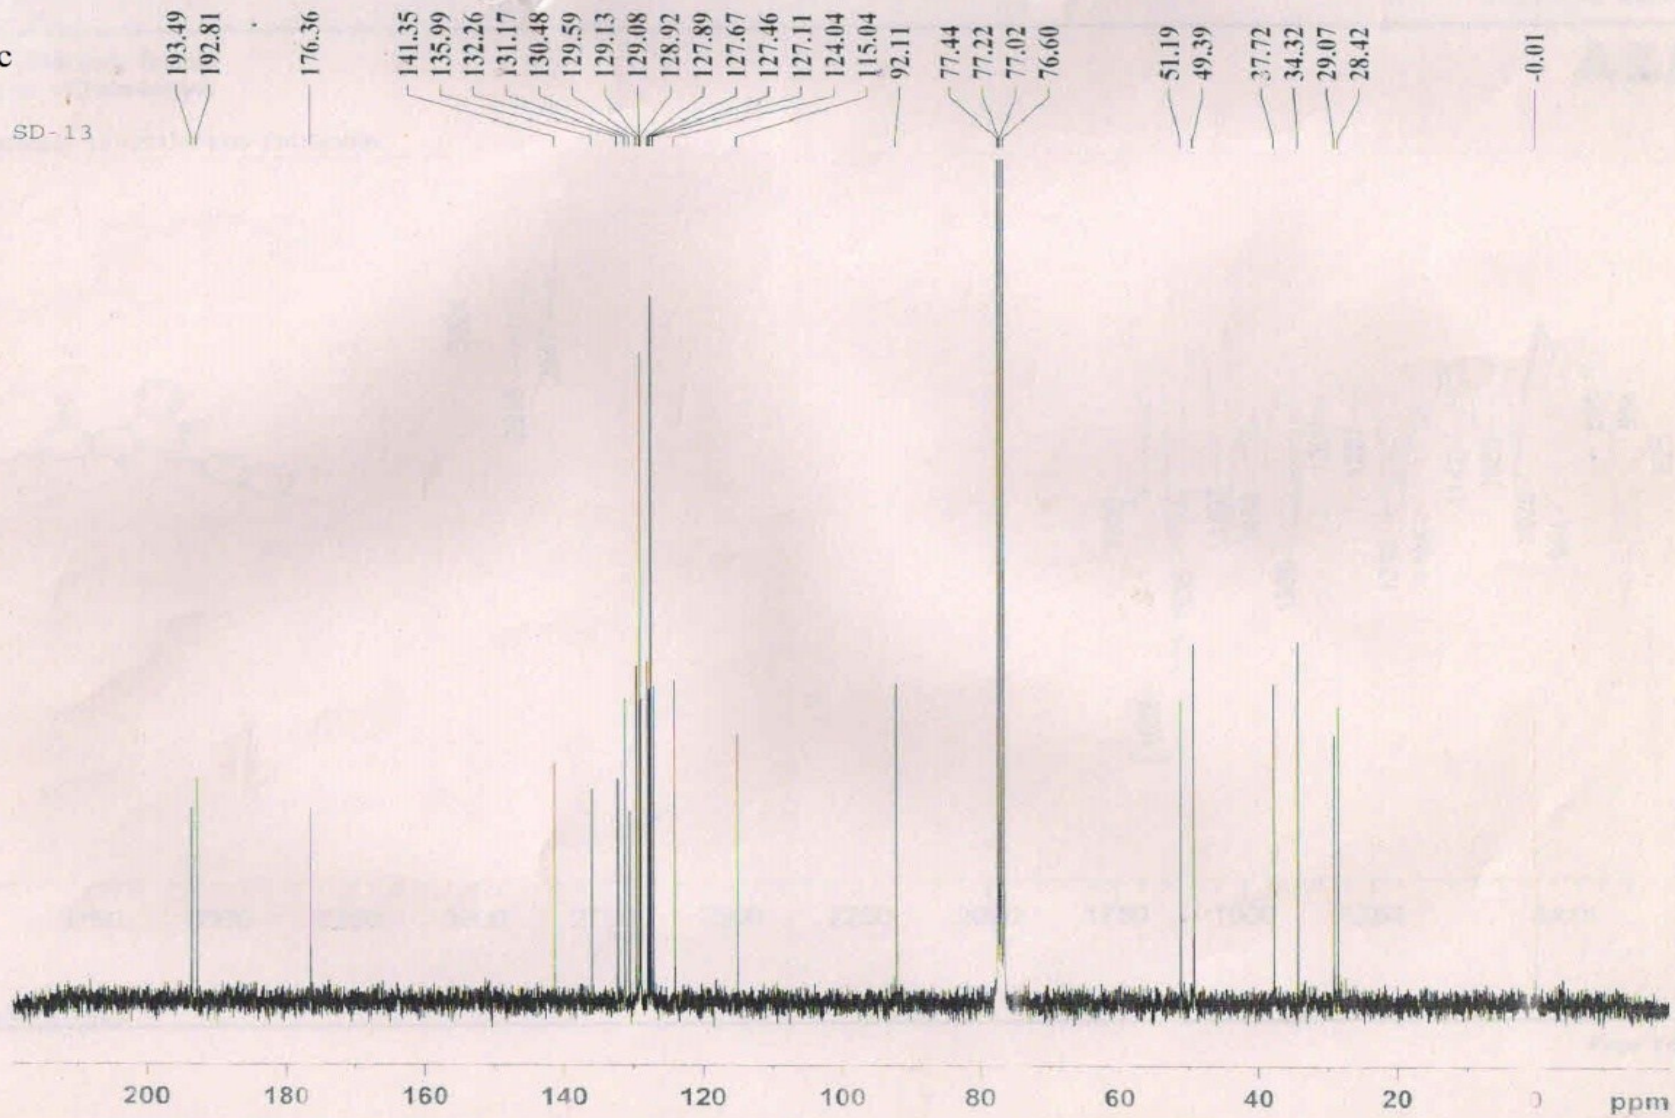

1d

SD-14

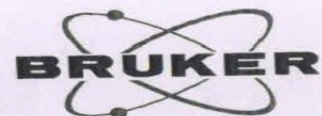

Current Data Parameters  
 NAME April 4 2012  
 EXPNO 9  
 PROCNO 1

F2 - Acquisition Parameters  
 Date\_ 20120410  
 Time\_ 11.00  
 INSTRUM spect  
 PROBHD 5 mm Multinucl  
 PULPROG zg30  
 TD 65536  
 SOLVENT CDCl3  
 NS 16  
 DS 2  
 SWH 6172.839 Hz  
 FIDRES 0.094190 Hz  
 AQ 5.3084660 sec  
 RG 362  
 DM  
 DE 81.000 usec  
 TE 6.00 usec  
 T1 0.0 K  
 D1 1.00000000 sec  
 MCREST 0.00000000 sec  
 MCWRK 0.01500000 sec

----- CHANNEL f1 -----  
 NUC1 1H  
 P1 7.25 usec  
 PL1 0.00 dB  
 SFO1 300.1318534 MHz

F2 - Processing parameters  
 SI 32768  
 SF 300.1300000 MHz  
 WDW EM  
 SSB 0  
 LB 0.30 Hz  
 GB 0  
 PC 1.00

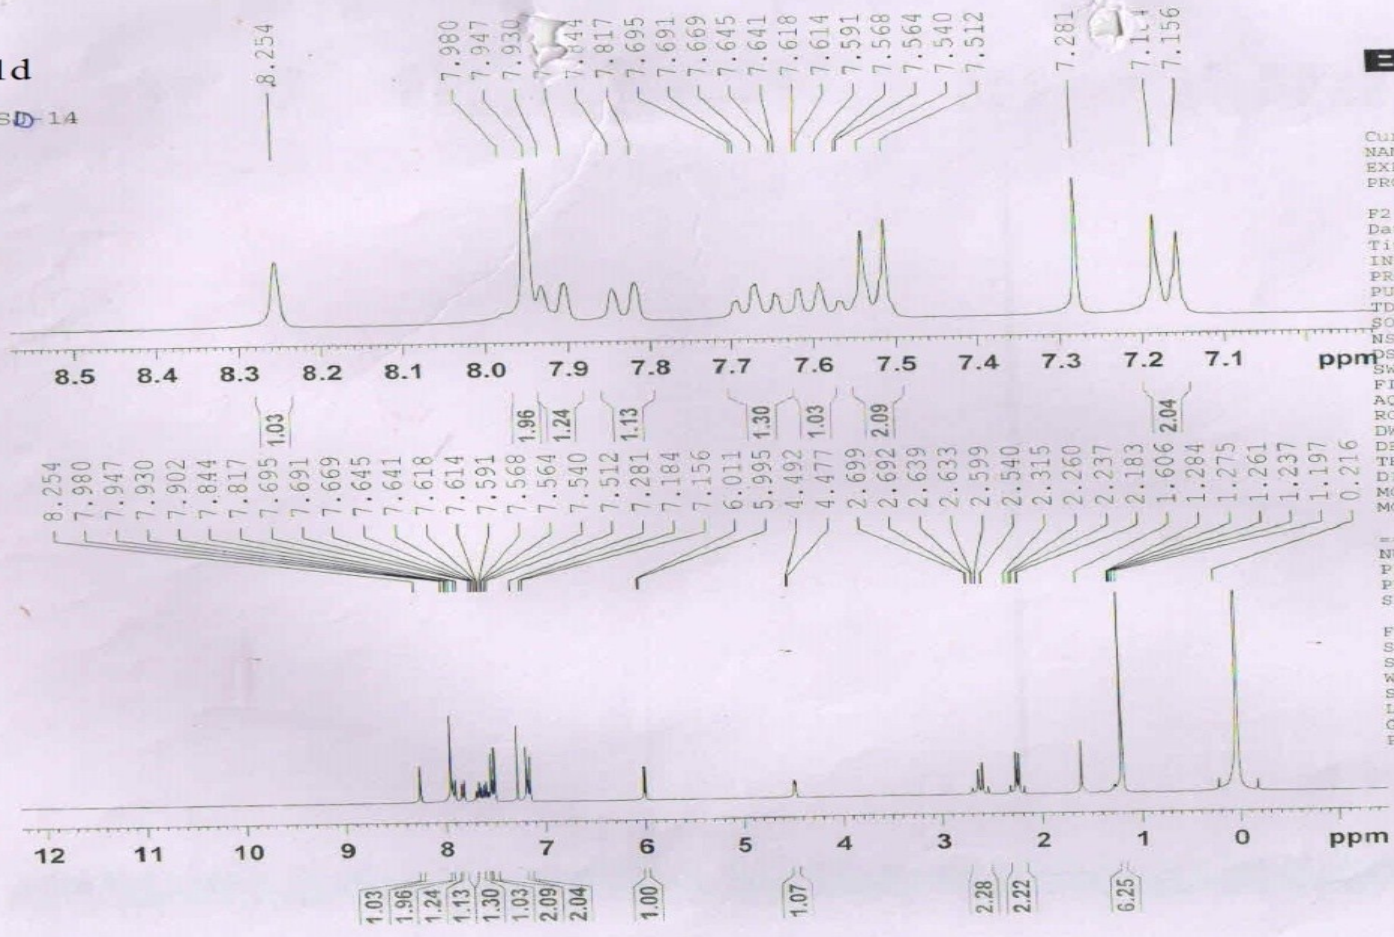

1d

SD-14

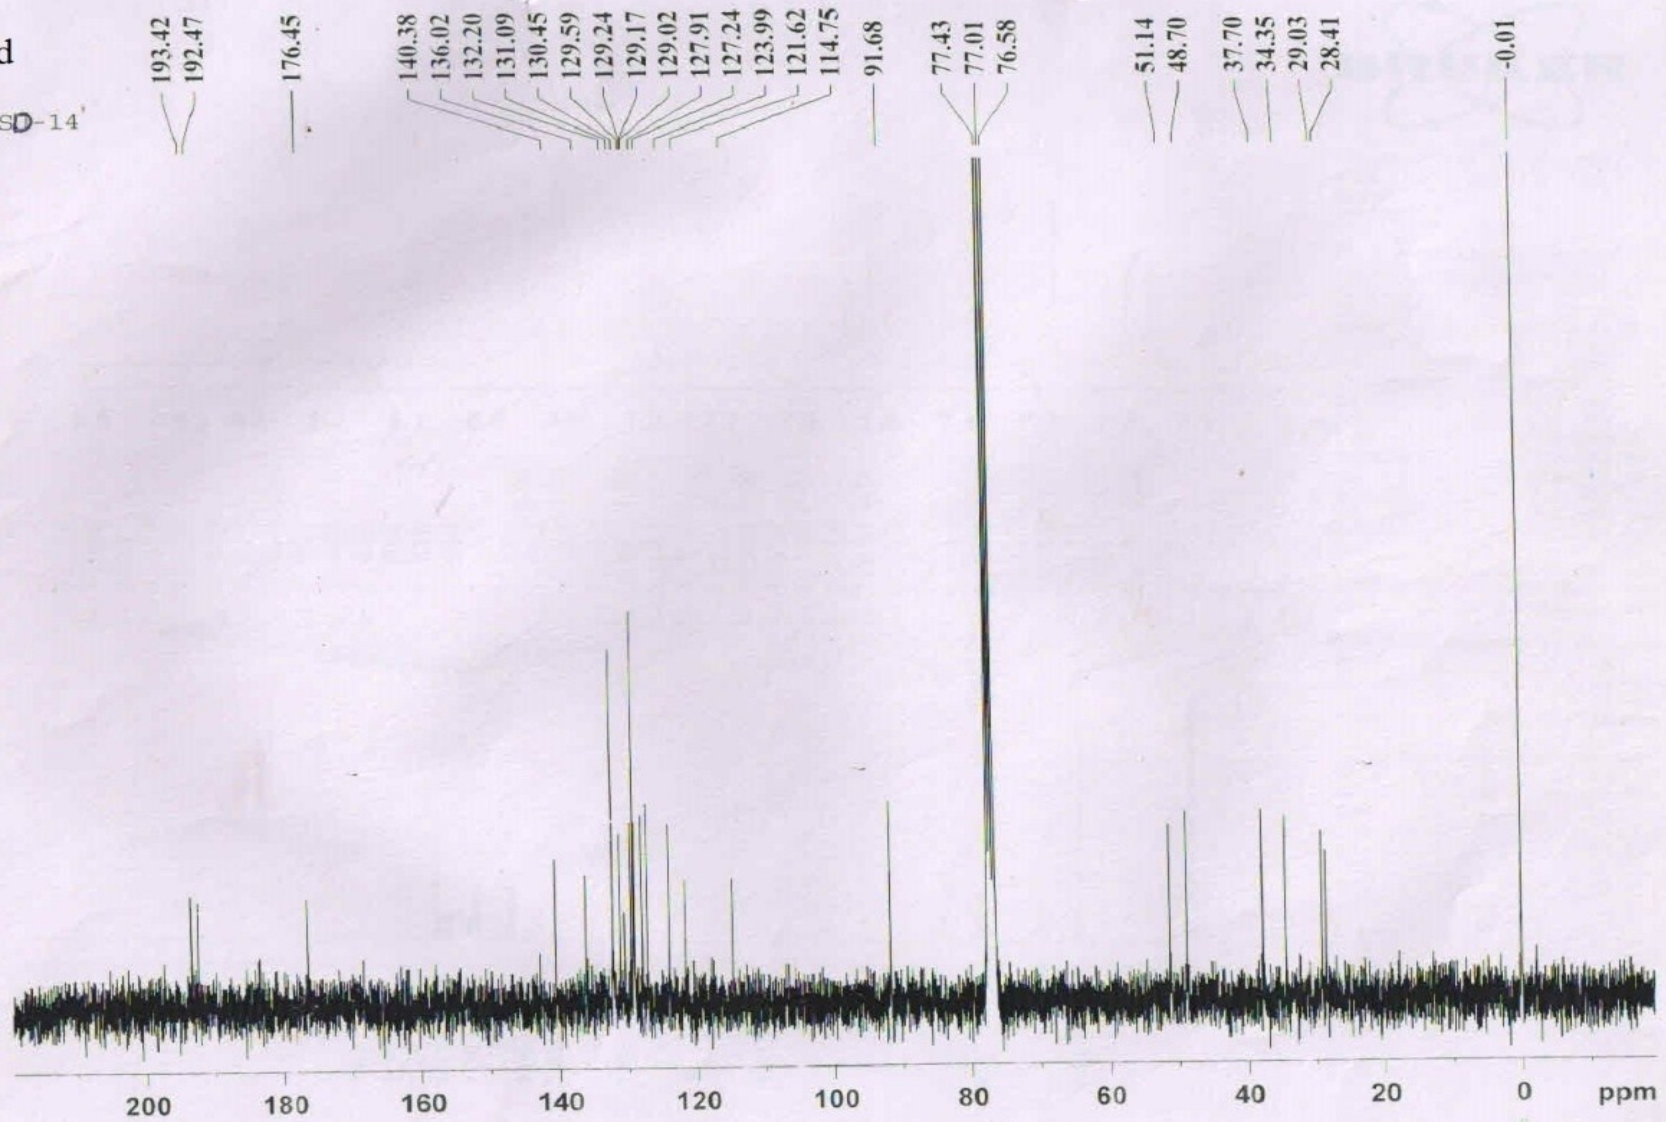

le

9:59:58 AM 1/17/2012

Operator: <Manjeet Saini>  
Department: <Chemistry>

ABB

TITLE: SampleSD -15 =2012-01-17 09h58m26s

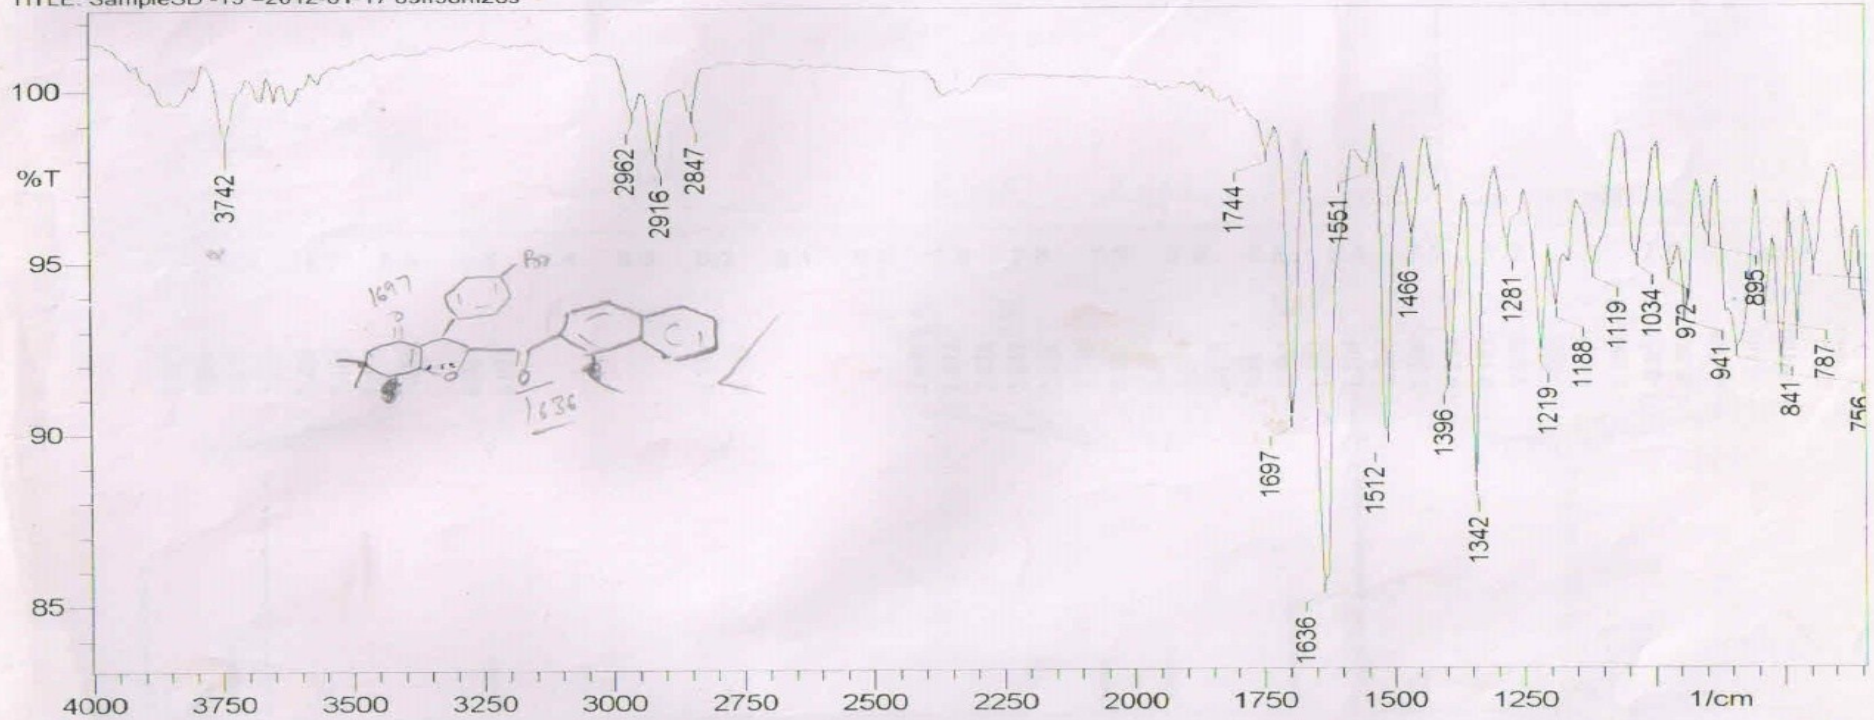

*Handwritten signature and date:*  
M. Saini  
17/1/12

SD-15

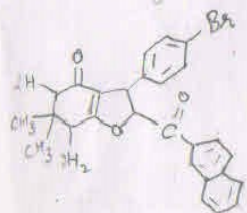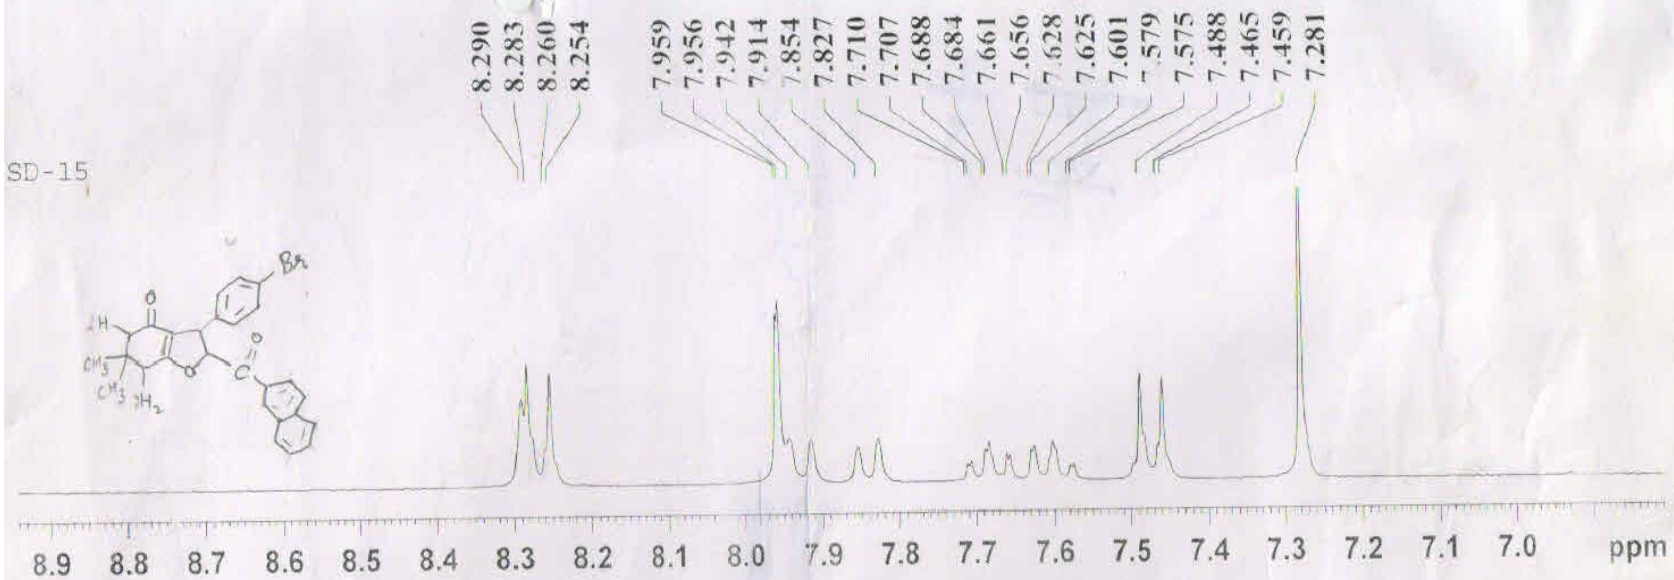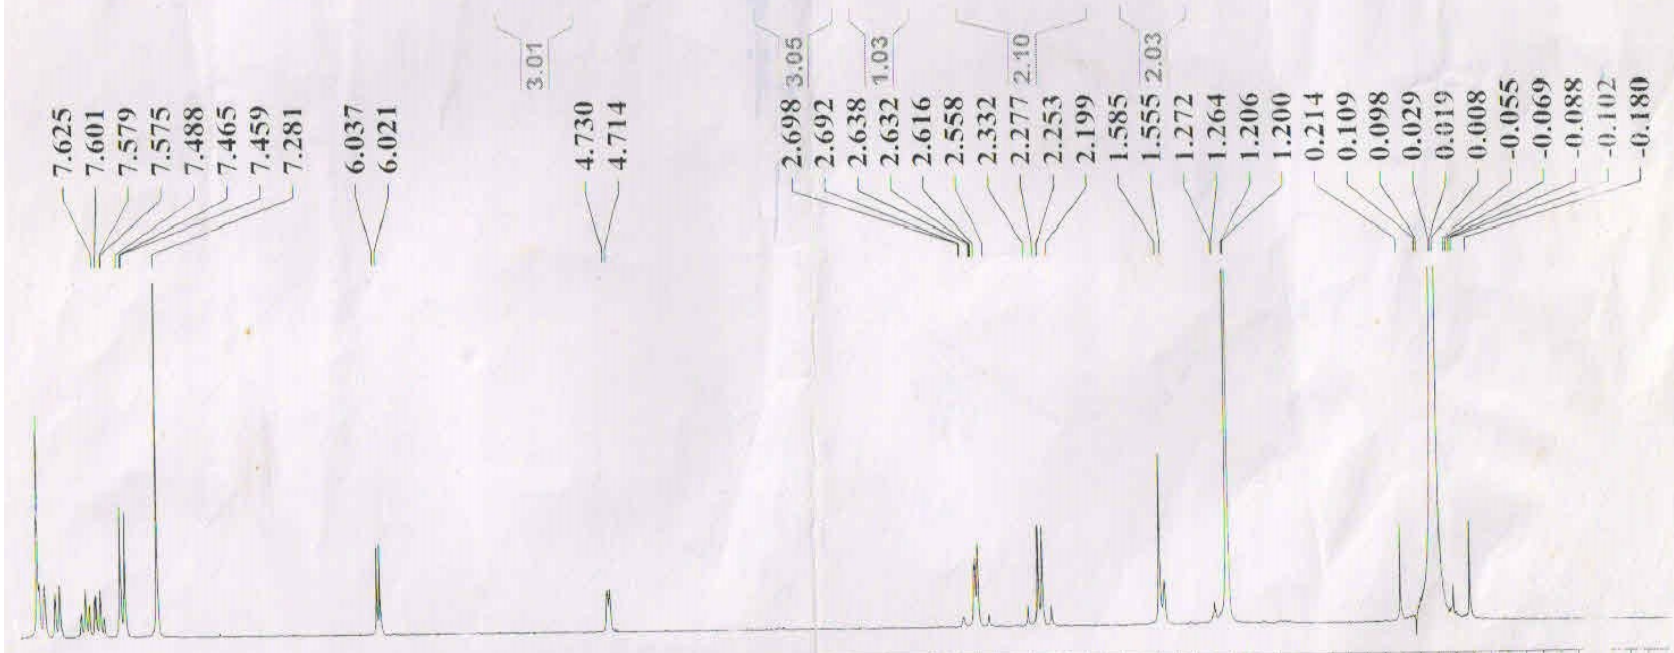

1e

SD-15

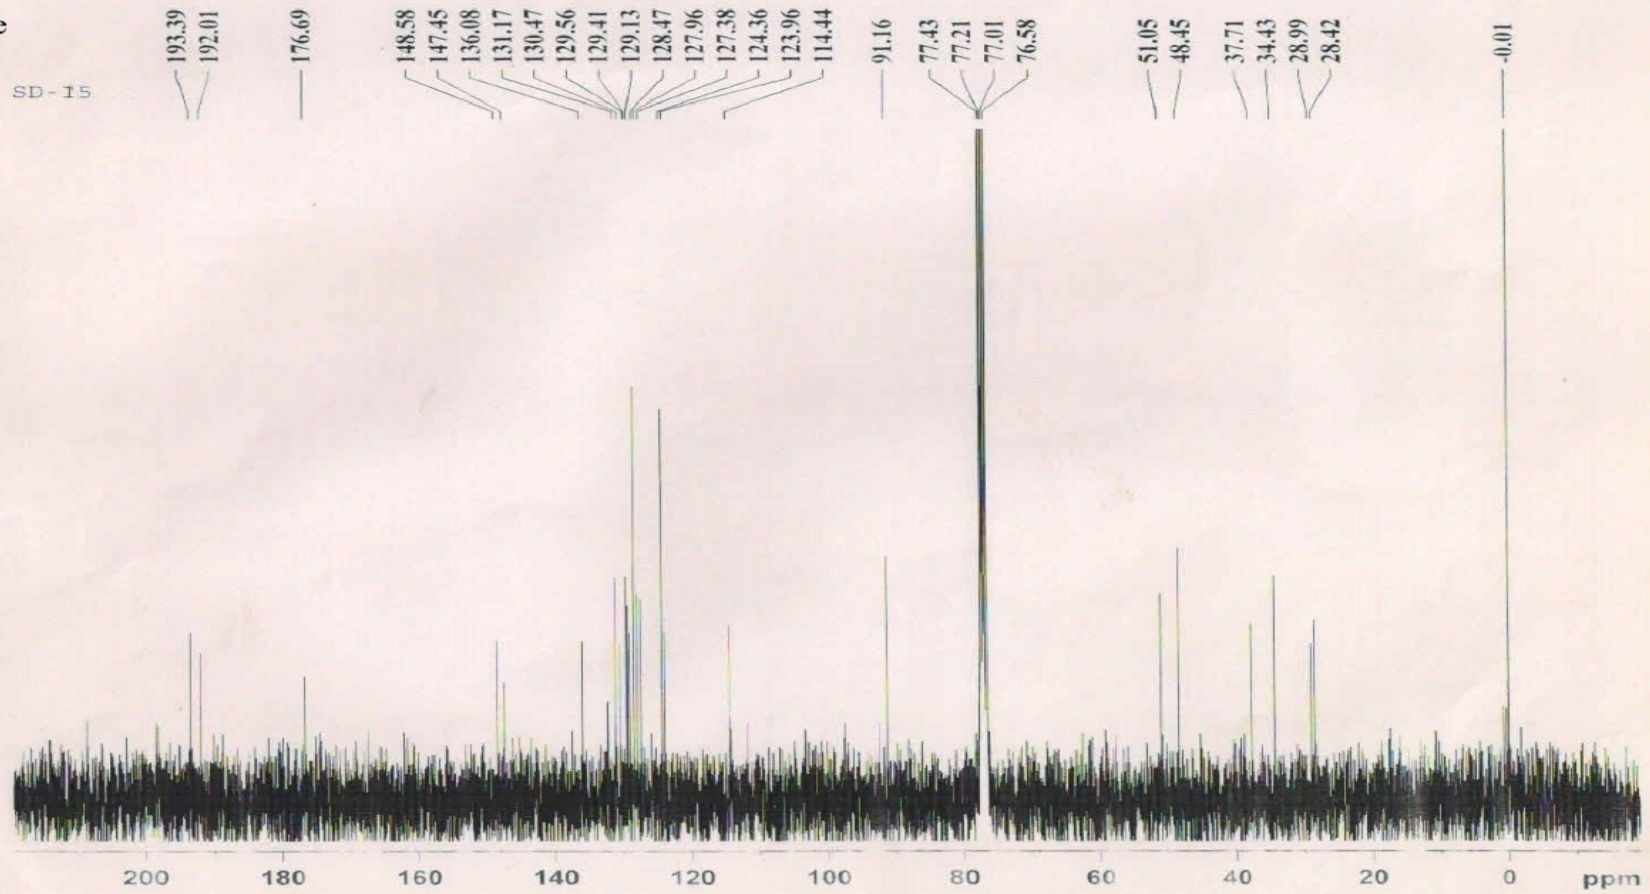



lf

SD-16

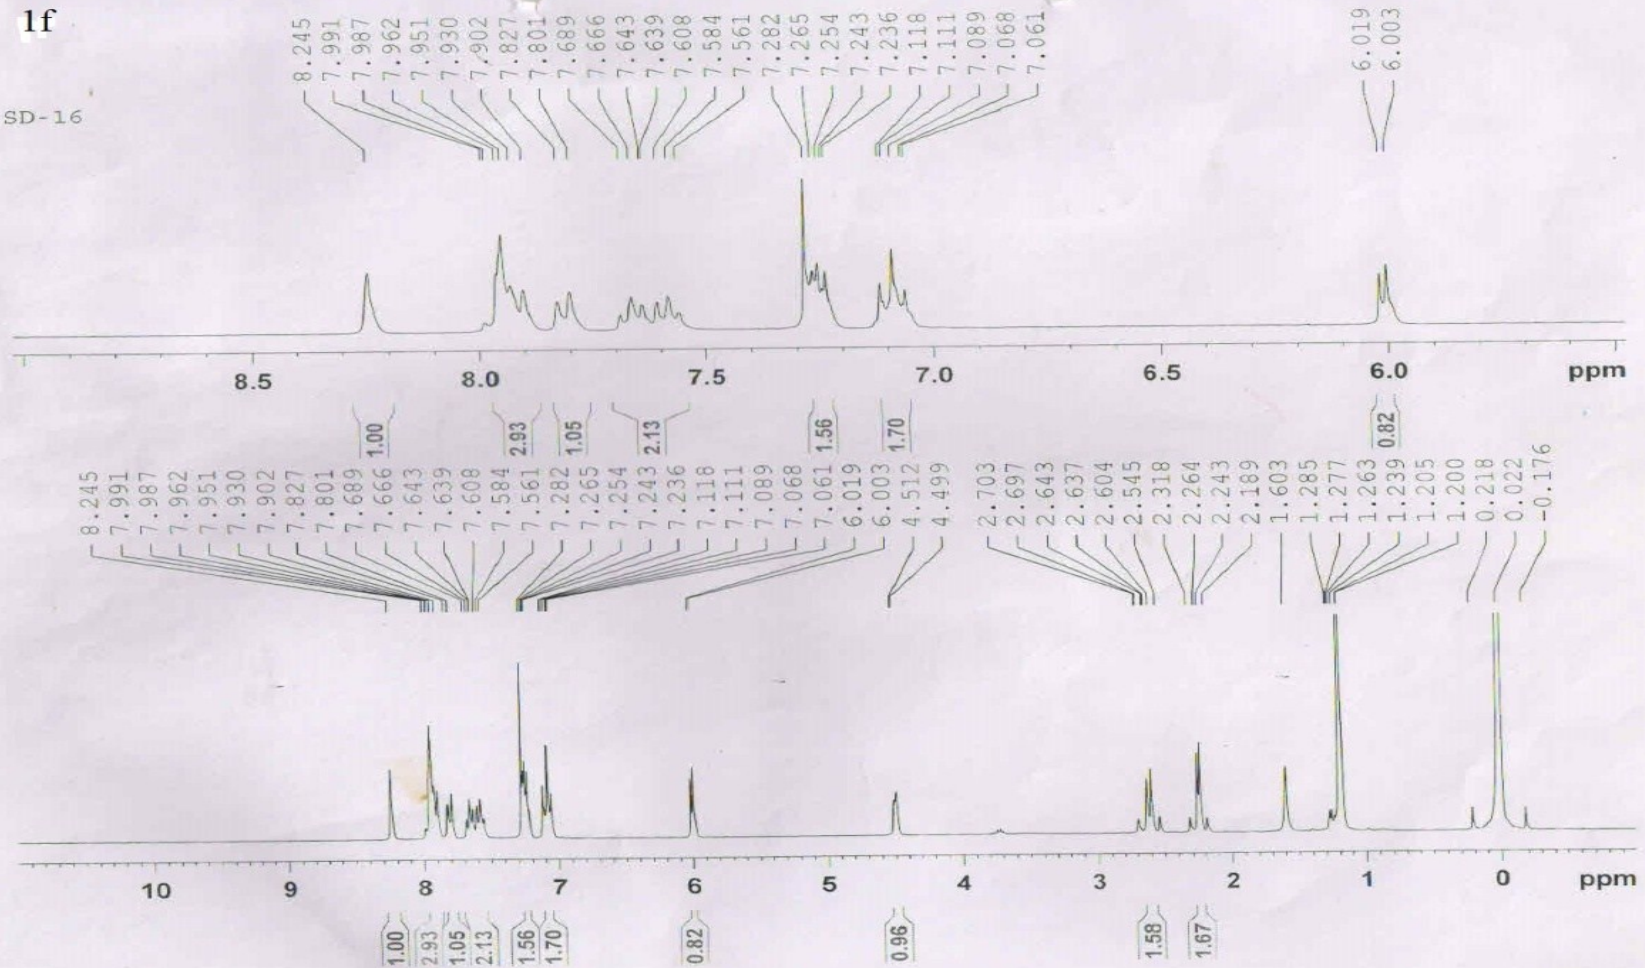

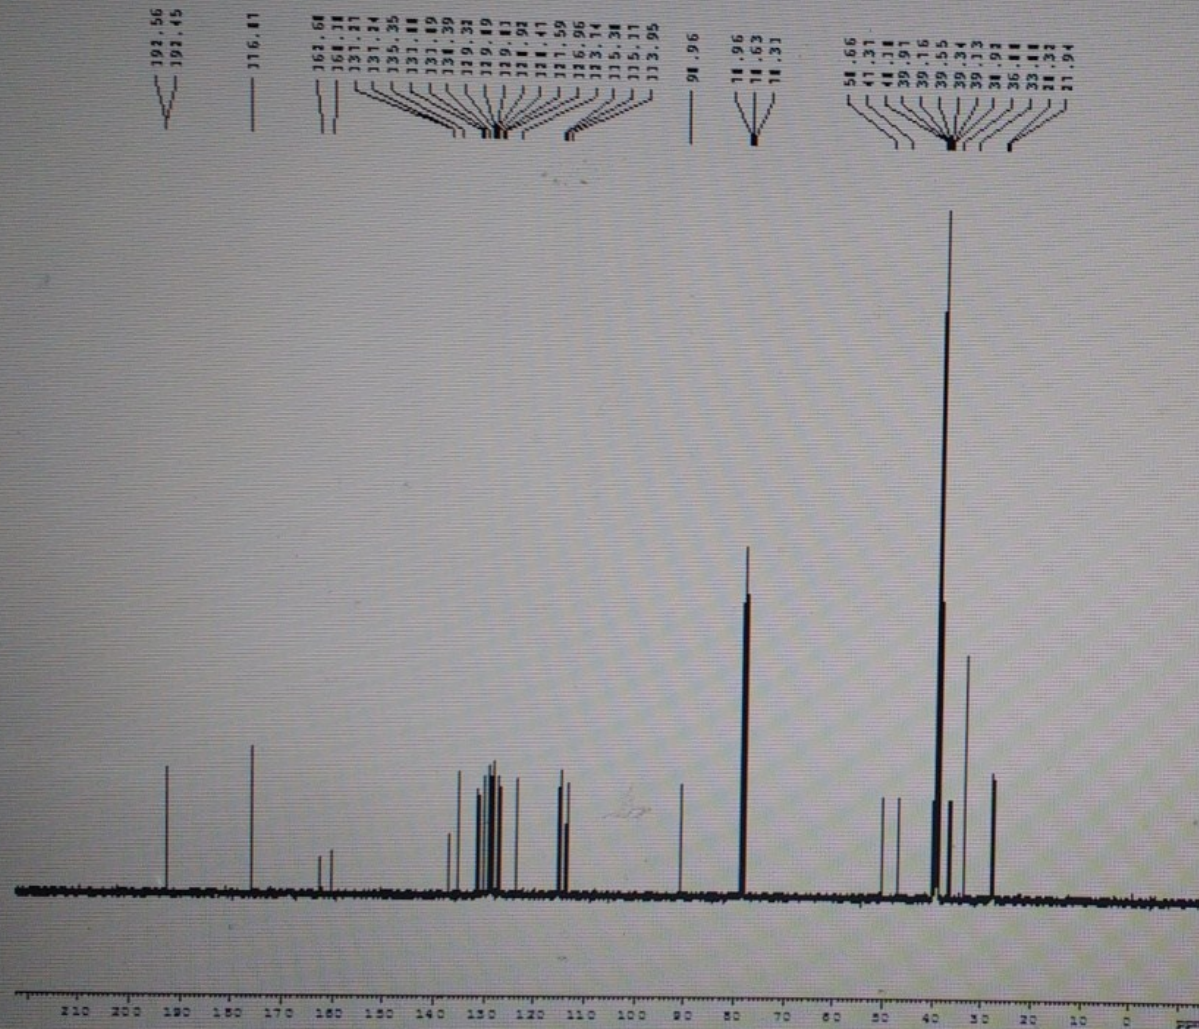

BRUKER  
 AVANCE II 400 NMR  
 Spectrometer  
 SAIF  
 Panjab University  
 Chandigarh

Current Data Parameters  
 NAME Dec10-2015  
 EXPNO 521  
 PROCNO 1

F2 - Acquisition Parameters  
 Date\_ 20151211  
 Time\_ 9.30  
 INSTRUM spect  
 PROBHD 5 mm PABBO BB-  
 PULPROG zgpg30  
 TD 65536  
 SOLVENT DMSO  
 NS 512  
 DS 4  
 SWH 29761.904 Hz  
 FIDRES 0.454131 Hz  
 AQ 1.1010548 sec  
 RG 1030  
 DW 16.800 usec  
 DE 6.00 usec  
 TE 294.5 K  
 D1 2.00000000 sec  
 d11 0.03000000 sec  
 DELTA 1.89999998 sec  
 TDO 1

CHANNEL f1  
 NUC1 13C  
 P1 9.60 usec  
 PL1 -2.00 dB  
 SFO1 100.6228298 MHz

CHANNEL f2  
 CPDPRG2 waltz16  
 NUC2 1H  
 PCPD2 80.00 usec  
 PL2 -3.00 dB  
 PL12 14.31 dB  
 PL13 18.00 dB  
 SFO2 400.1316005 MHz

F2 - Processing parameters  
 SI 32768  
 SF 100.6128193 MHz  
 WDW EM  
 SSB 0  
 LB 1.00 Hz  
 GB 0  
 SC 1.40

manishkumarmanu1986@gmail.com



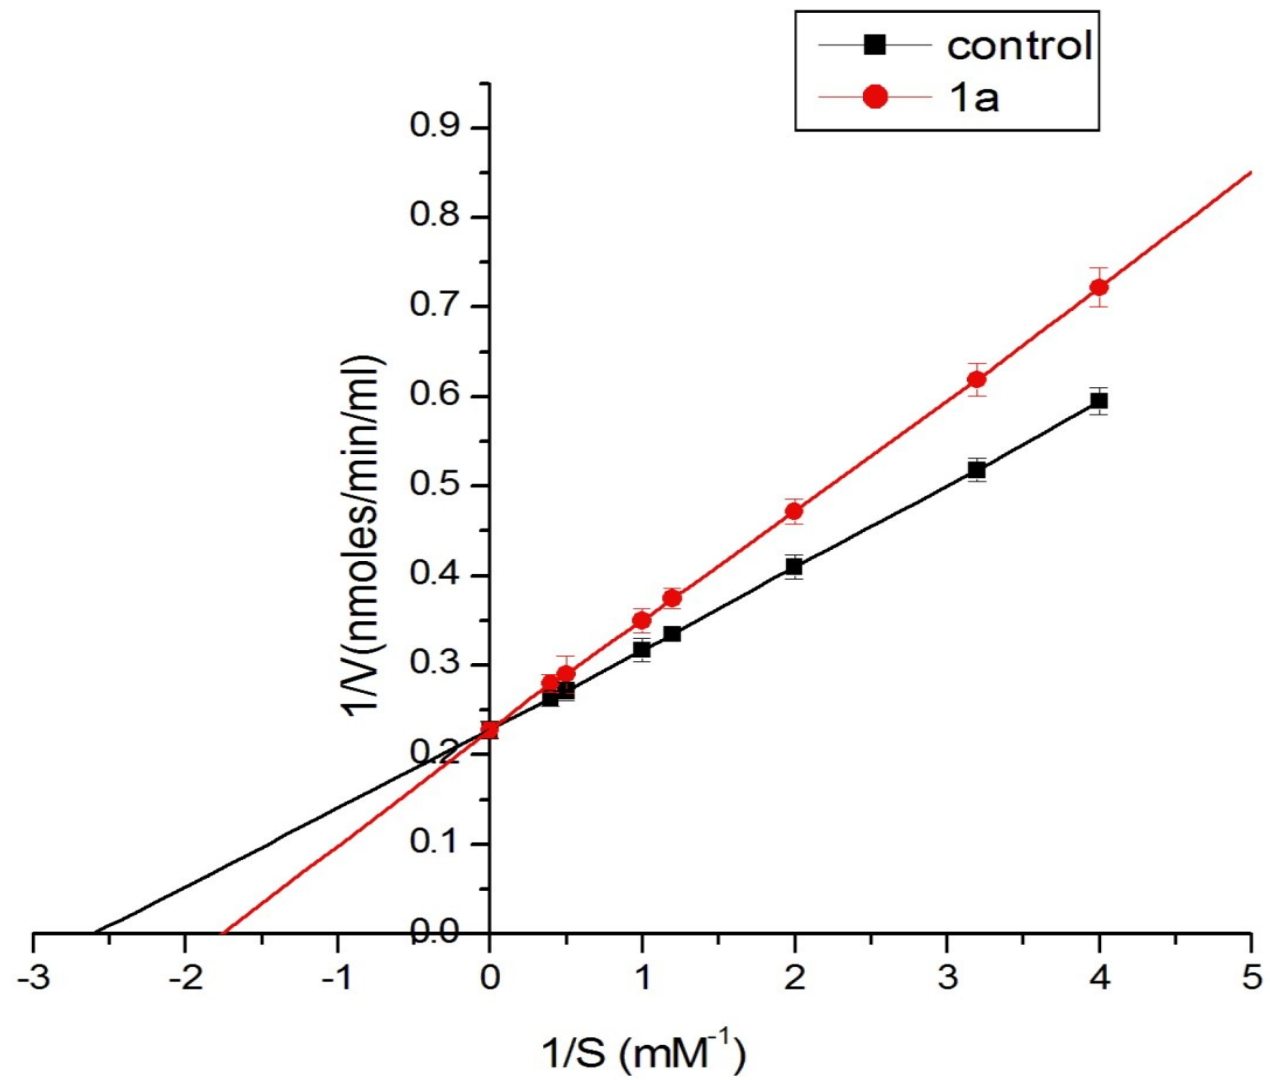

Figure B1

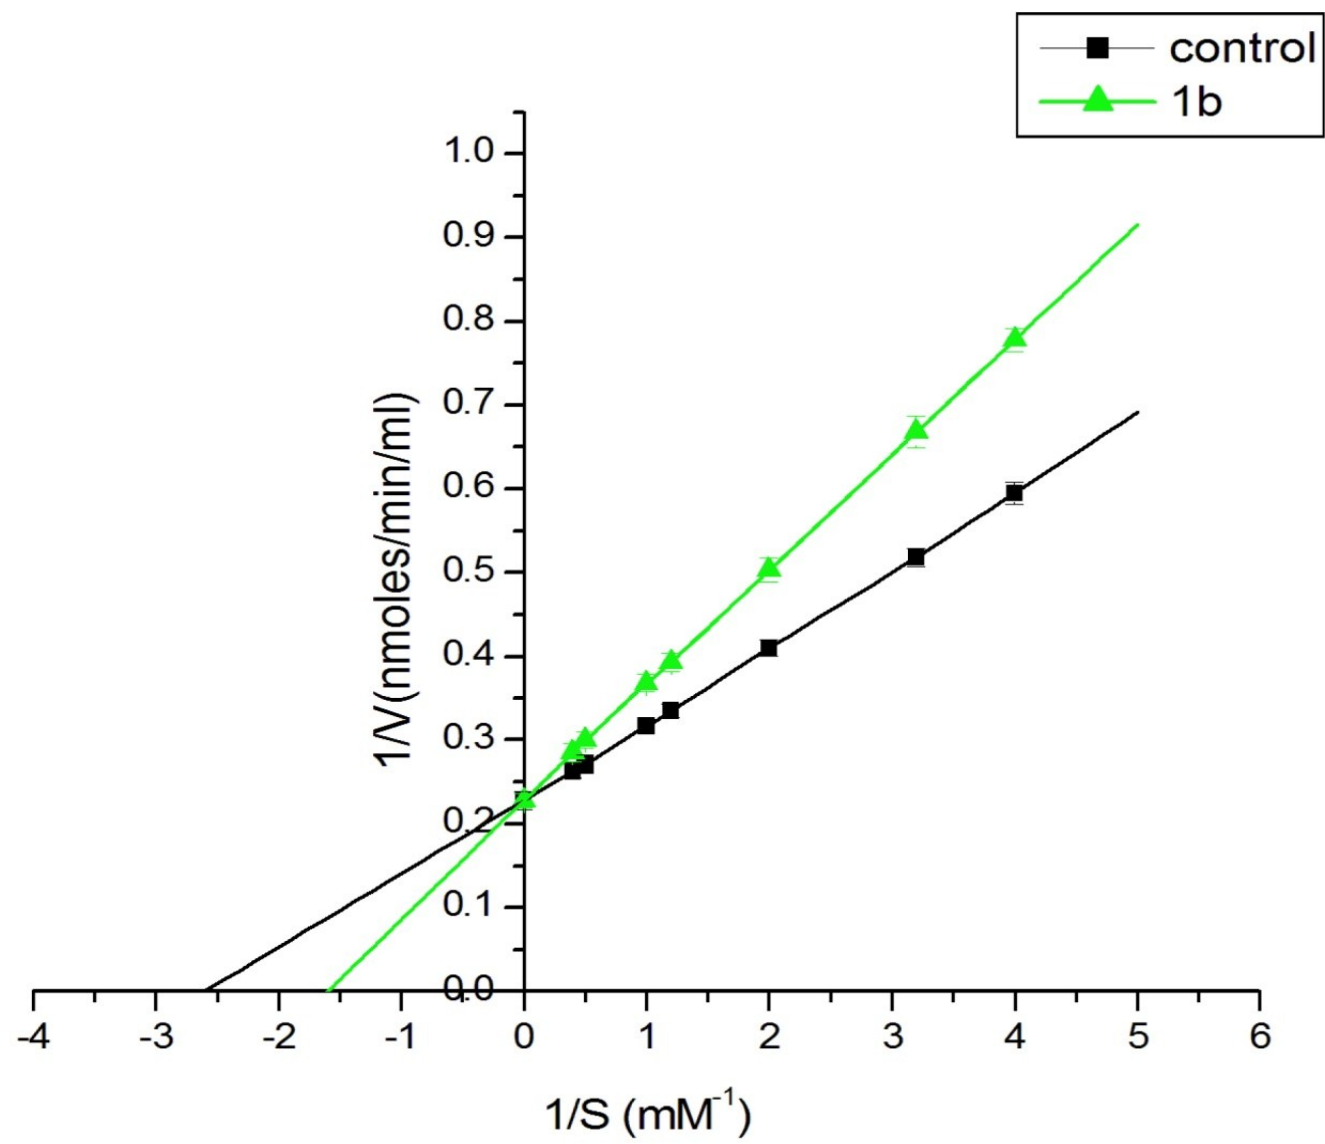

Figure B2

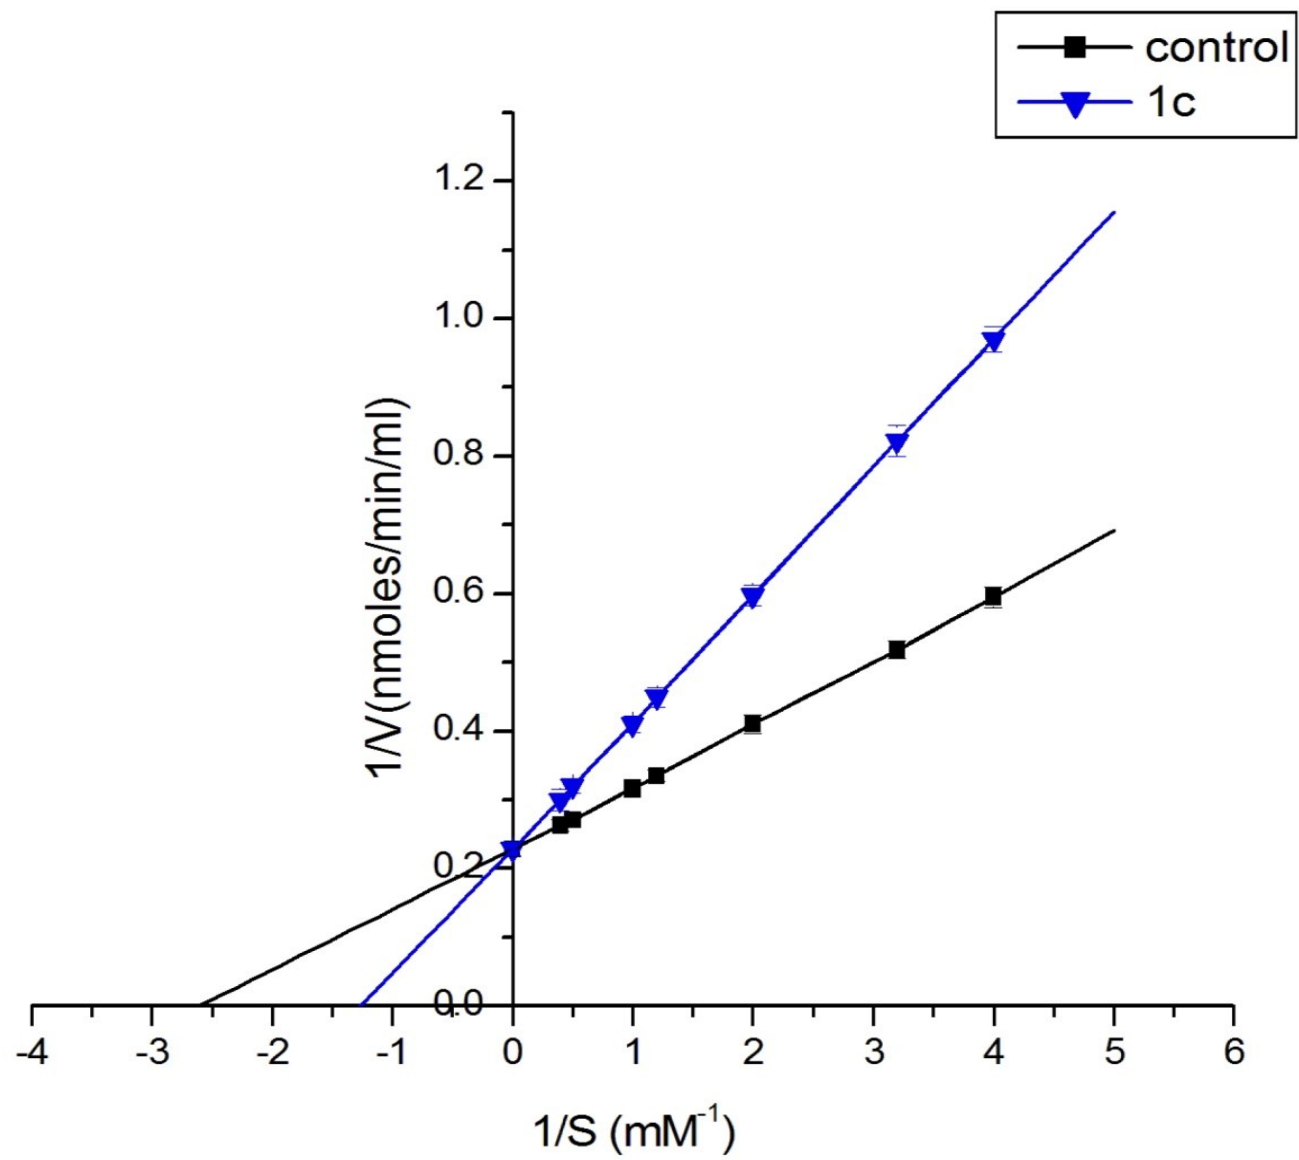

Figure B3

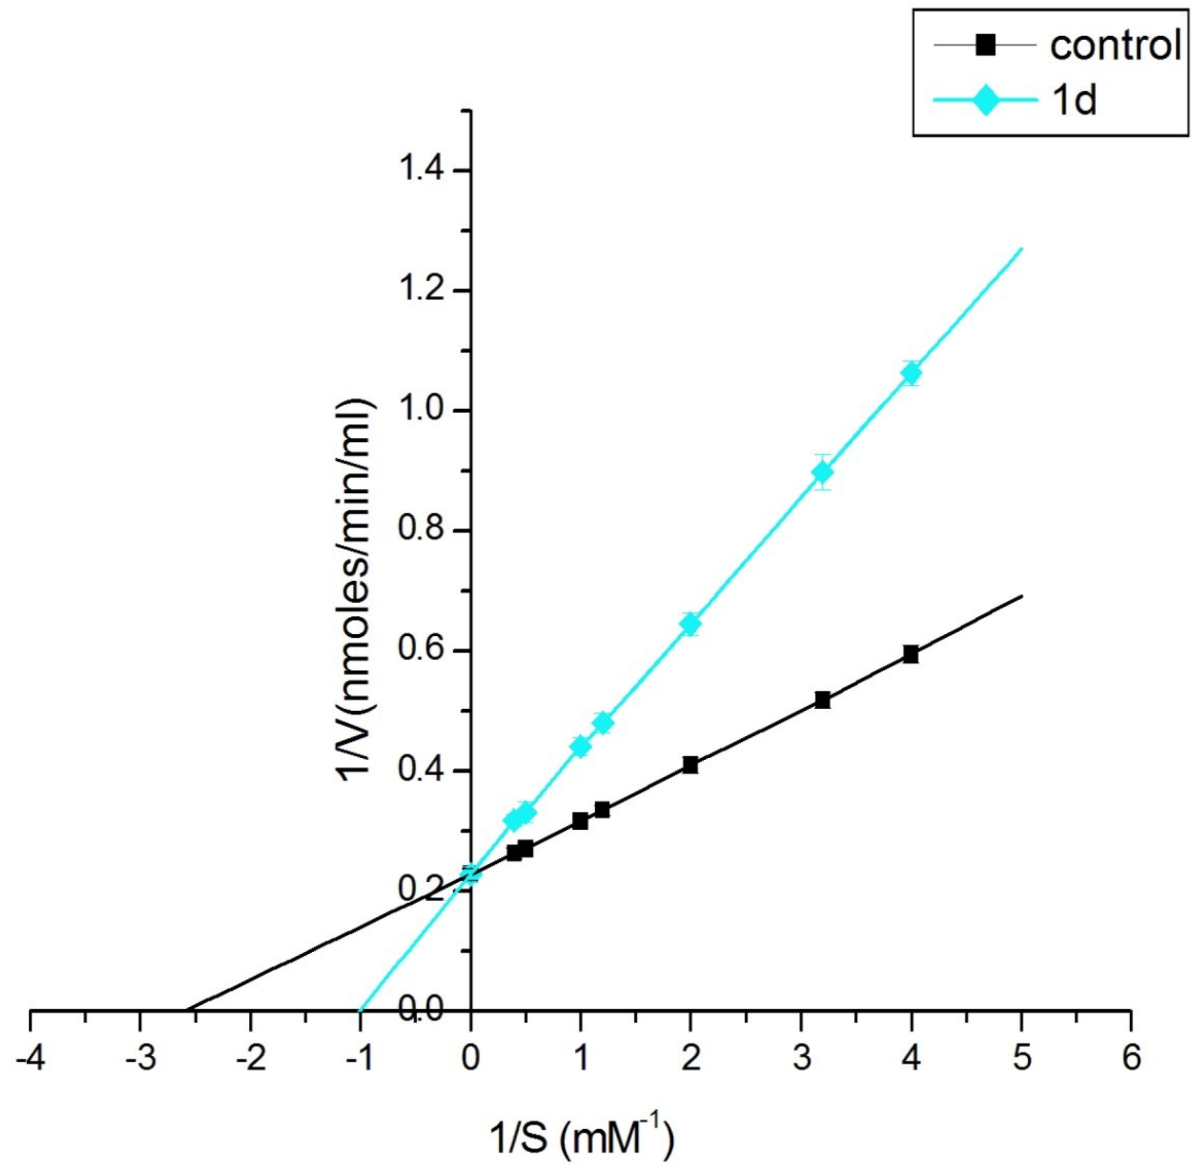

Figure B4

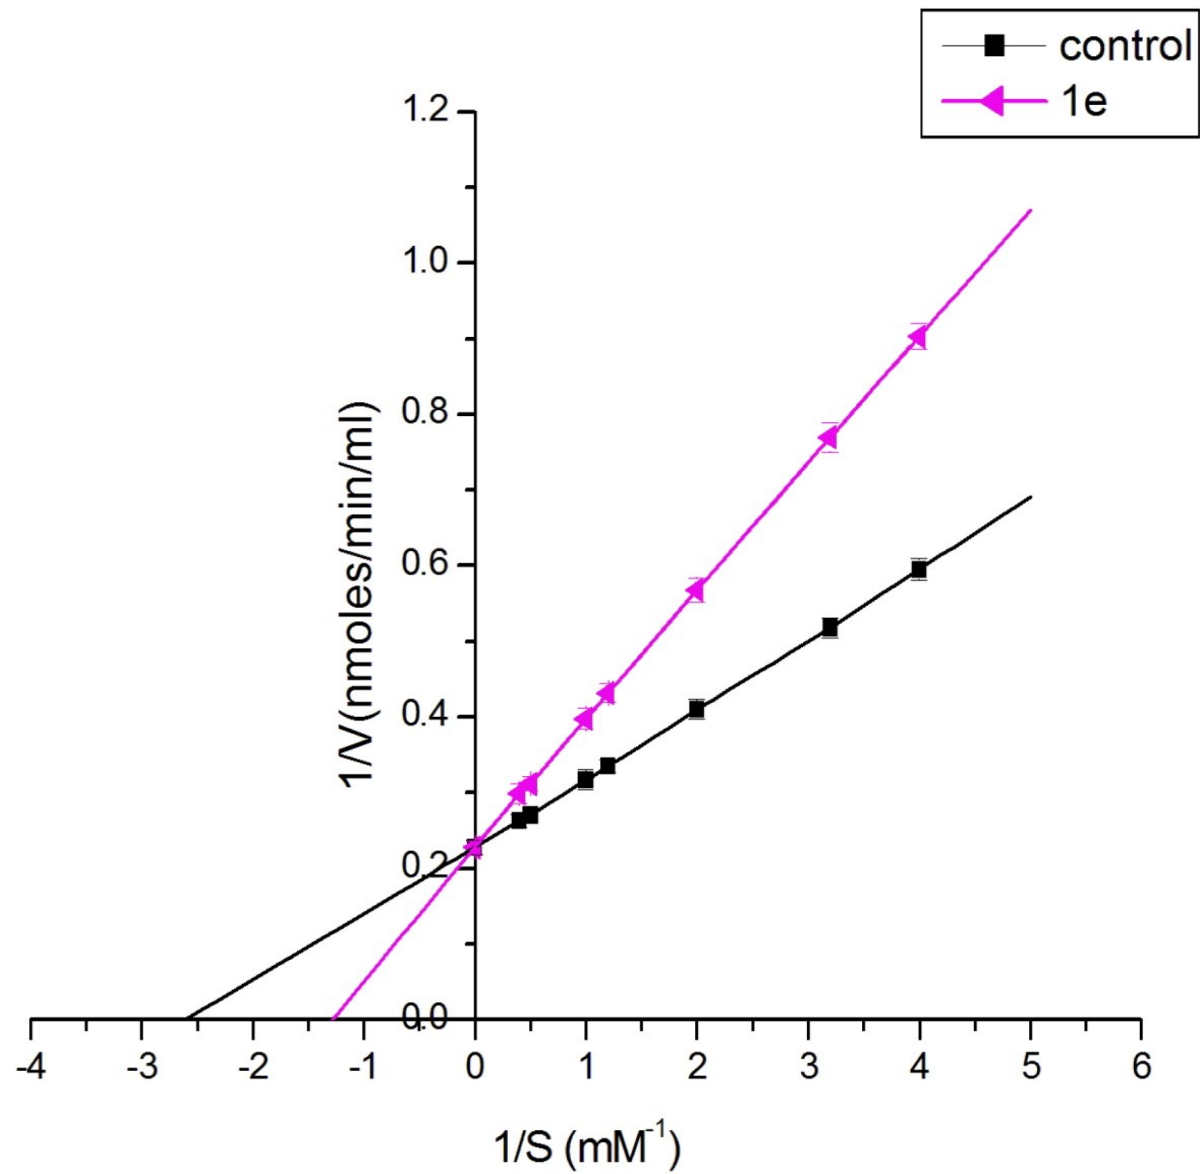

Figure B5



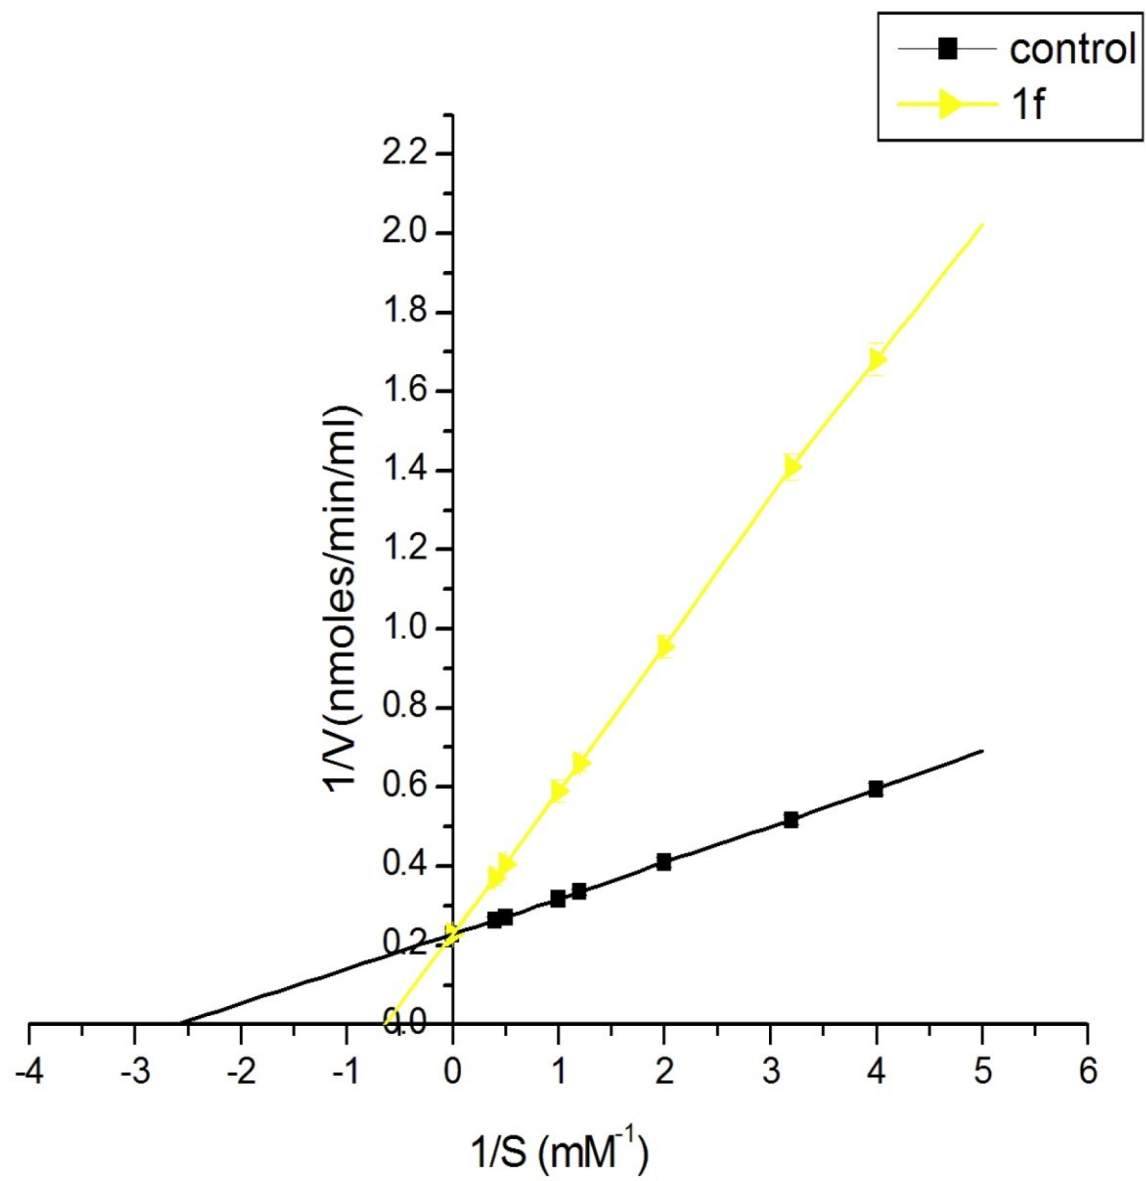

Figure B6

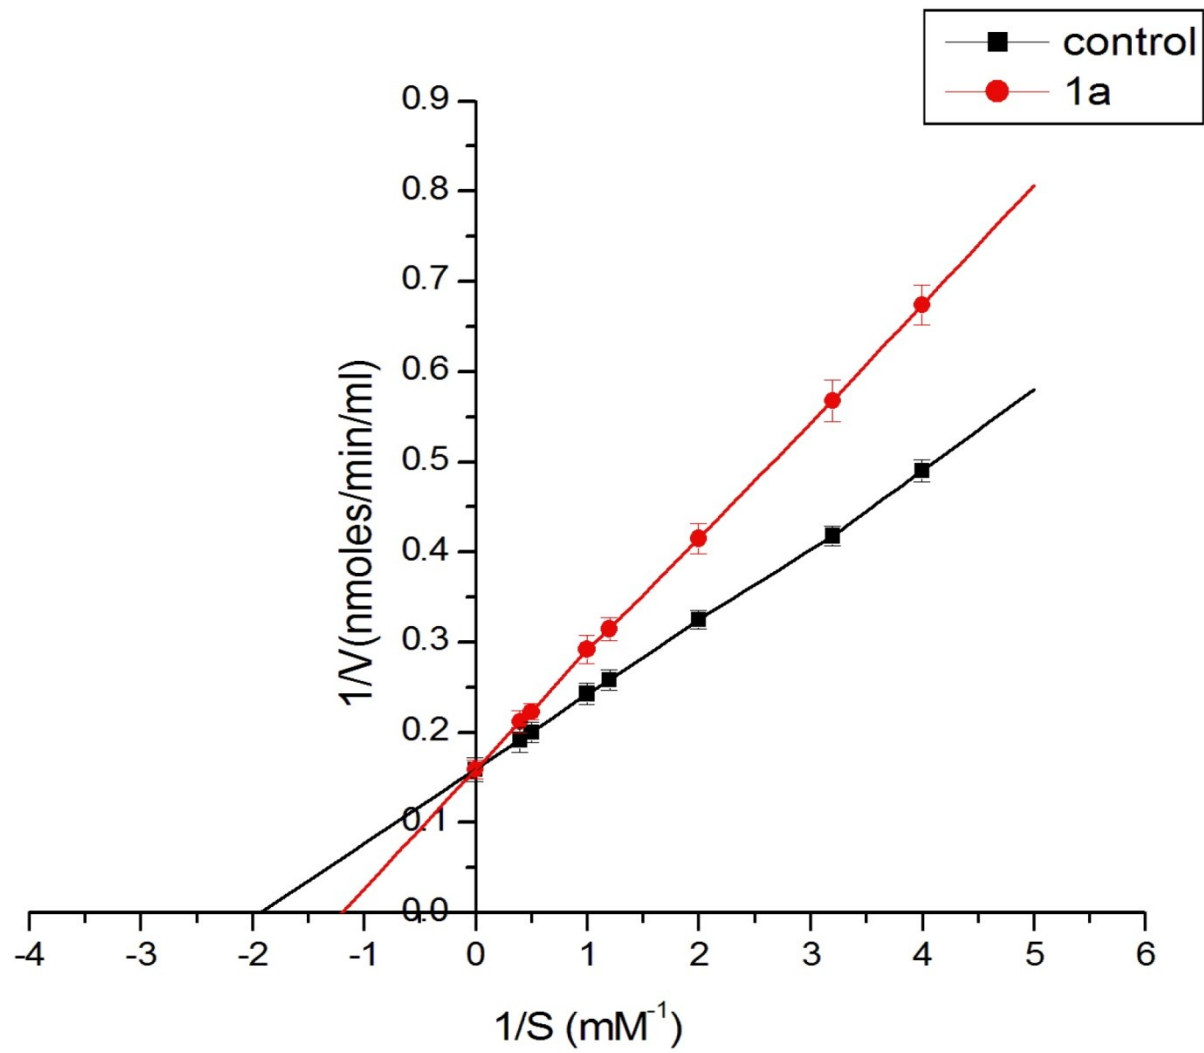

Figure H1

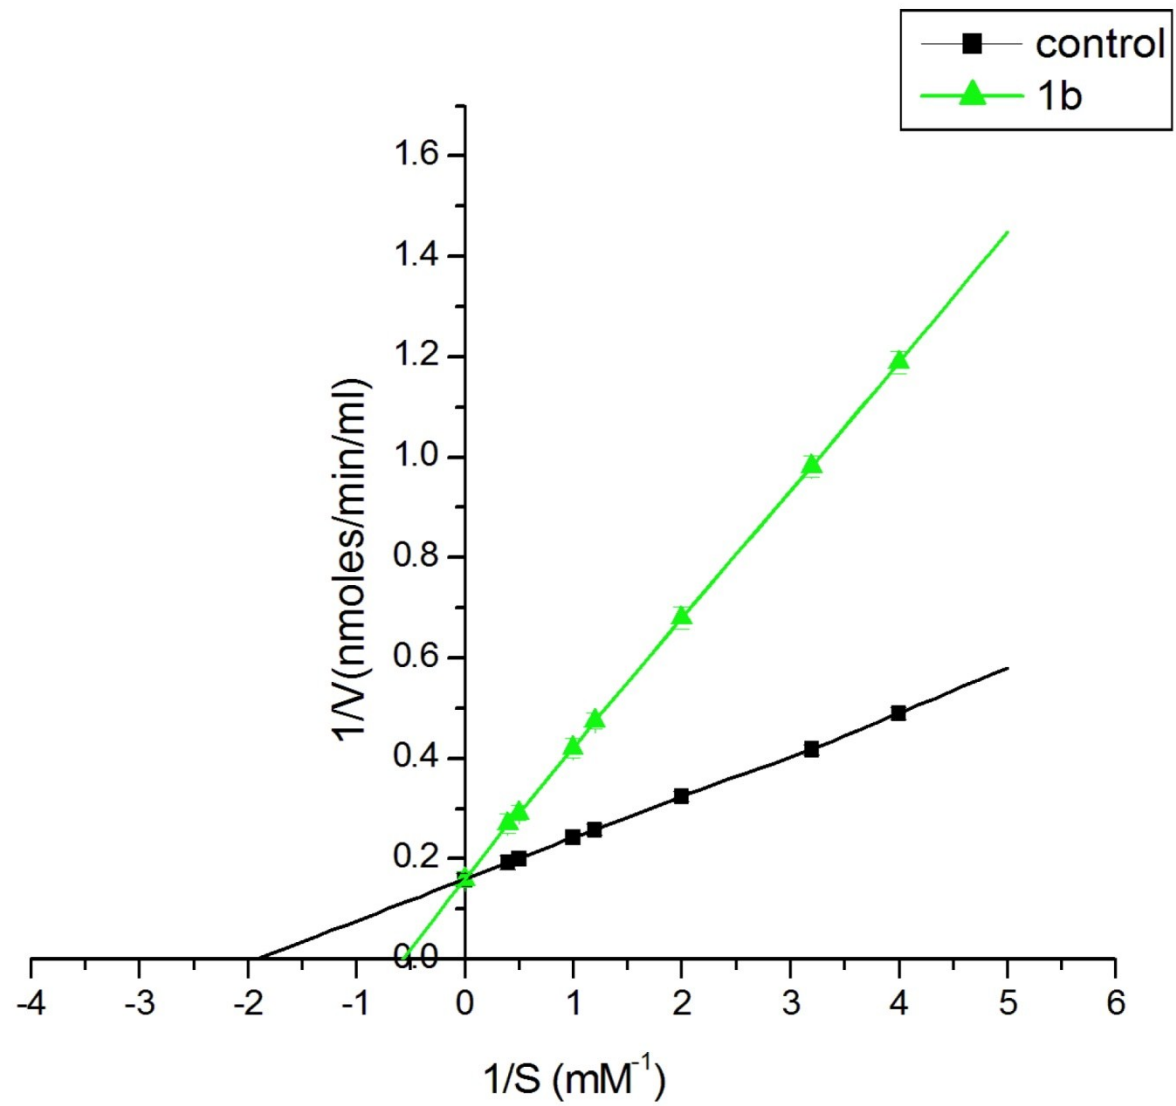

Figure H2

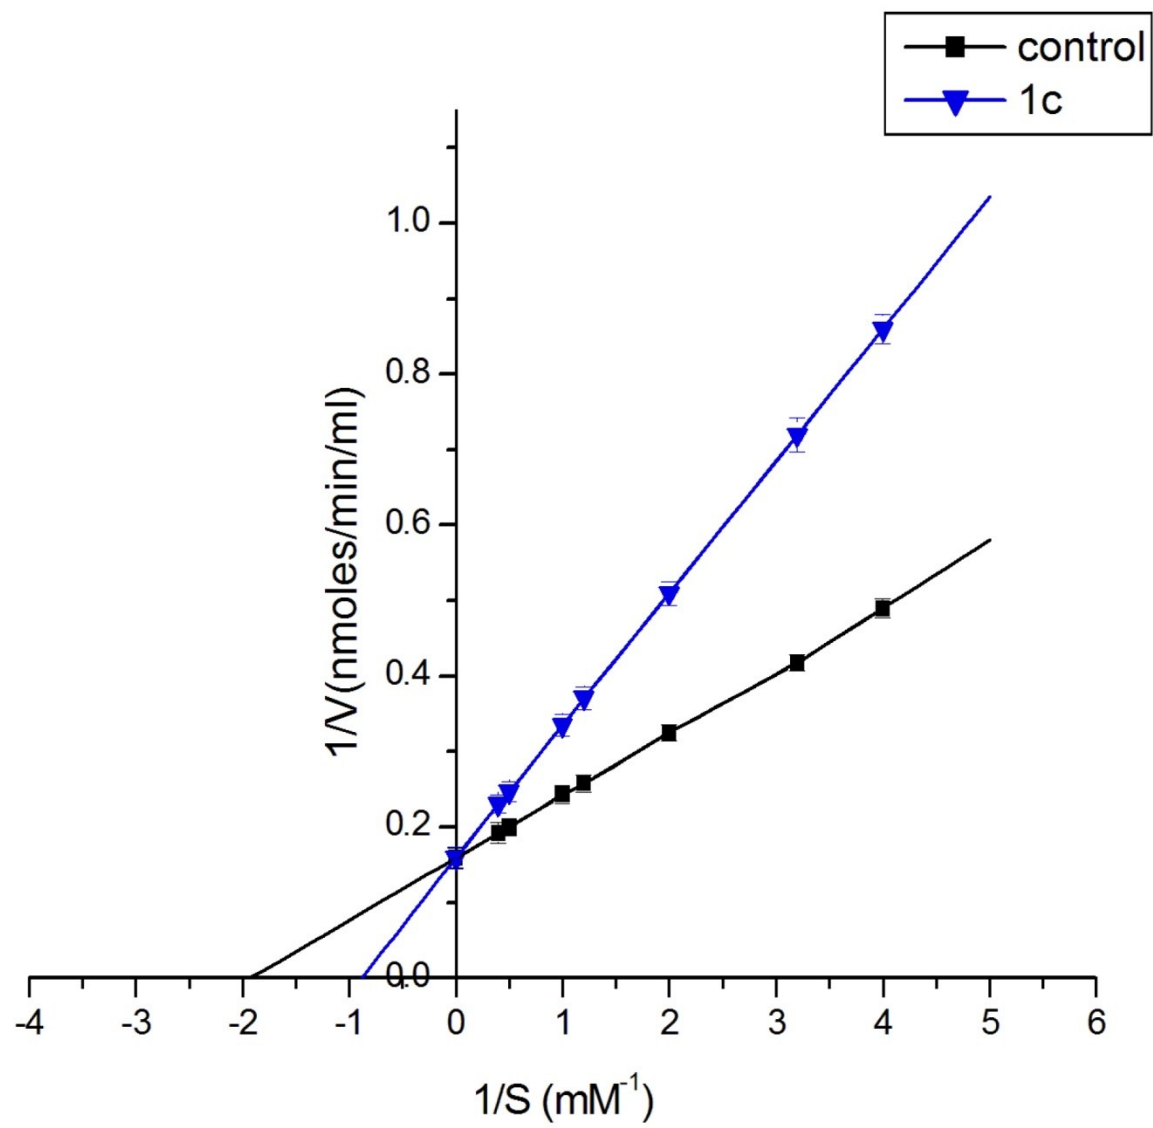

Figure H3

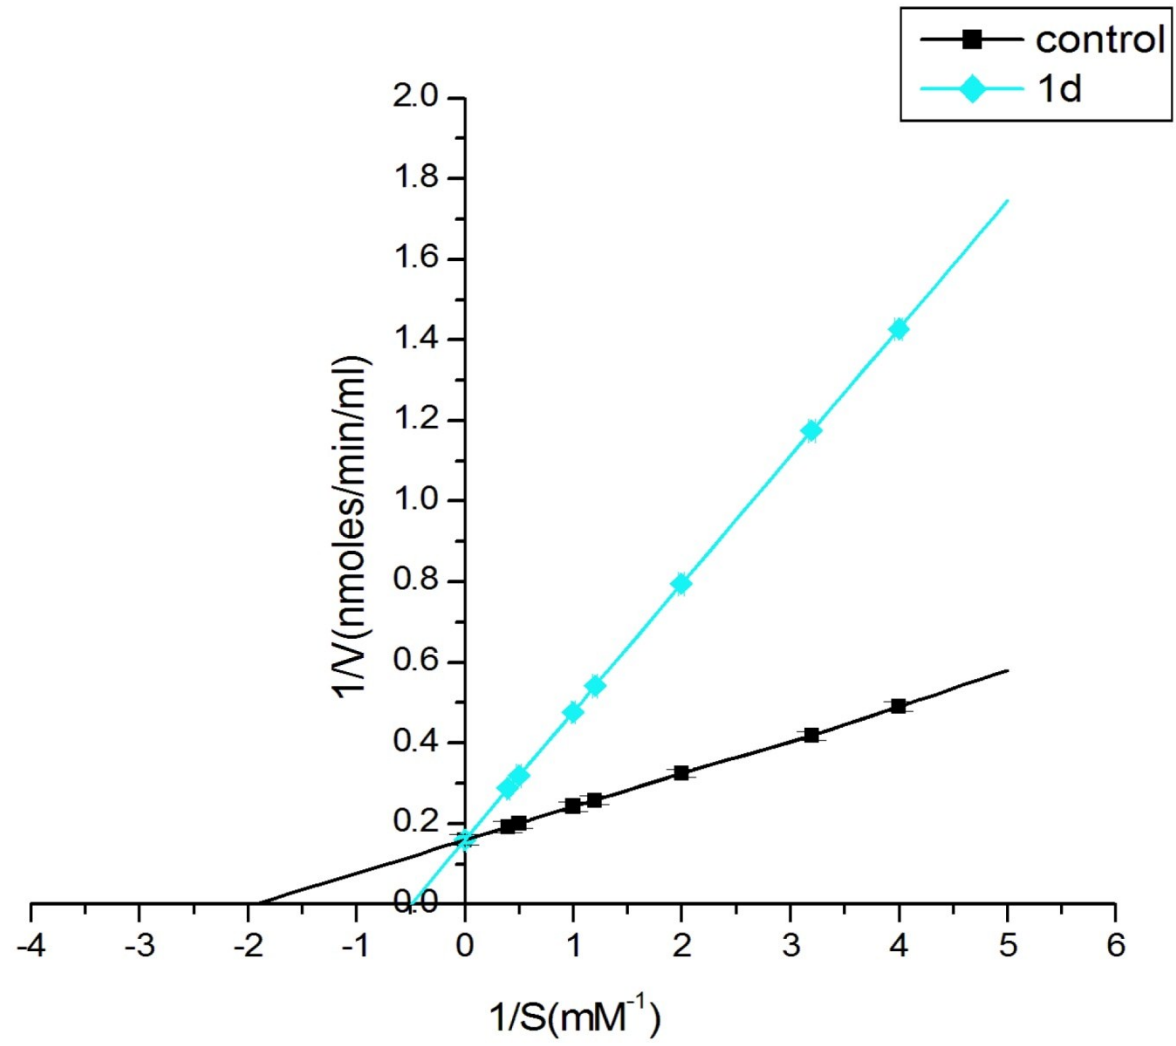

Figure H4

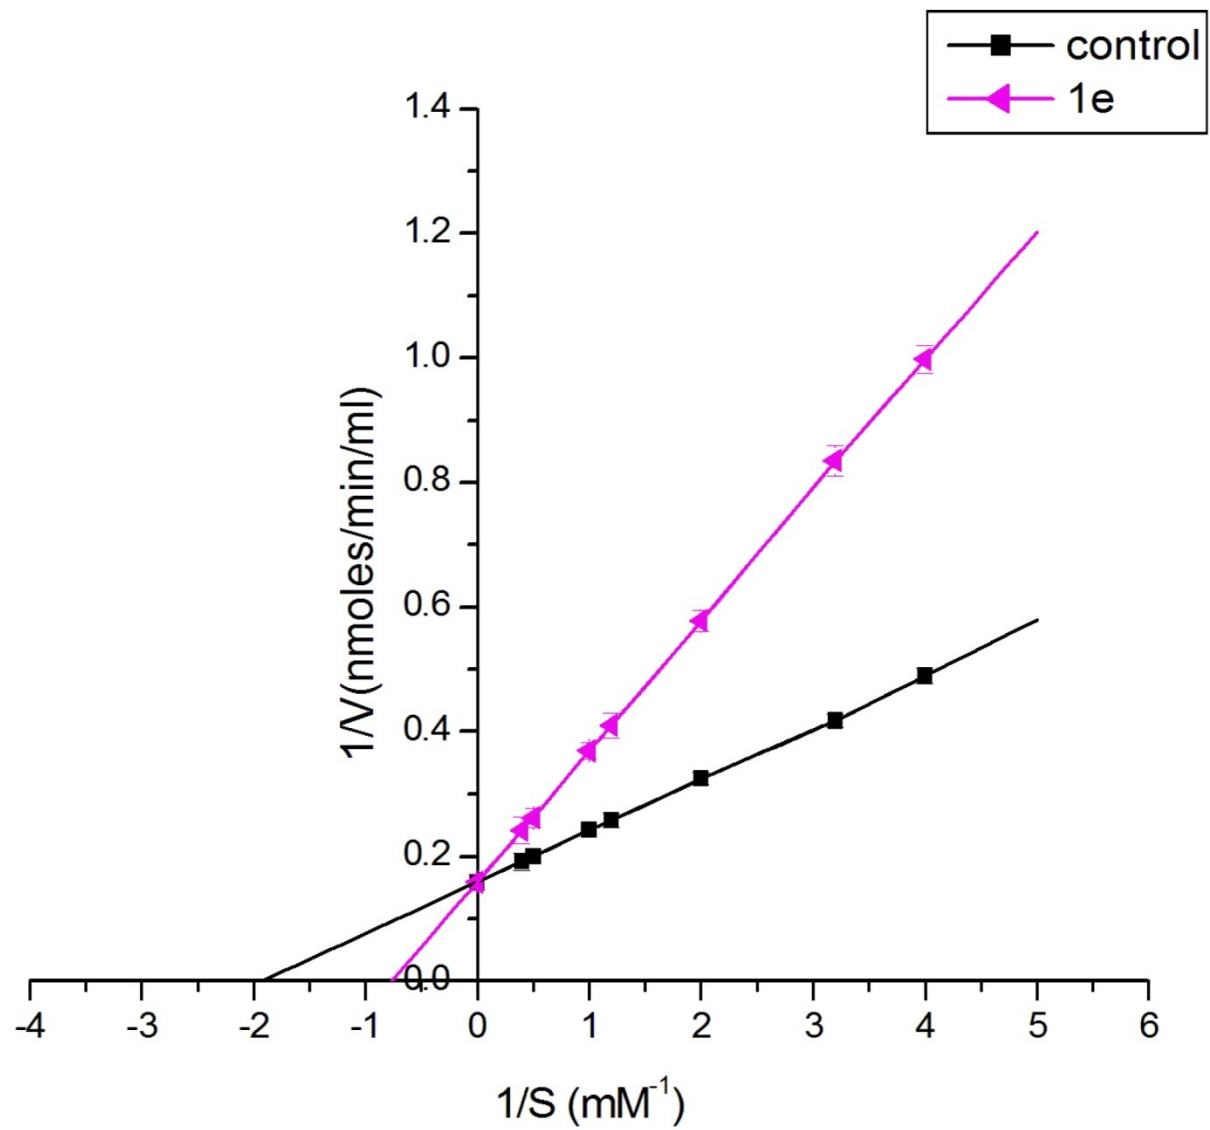

Figure H5

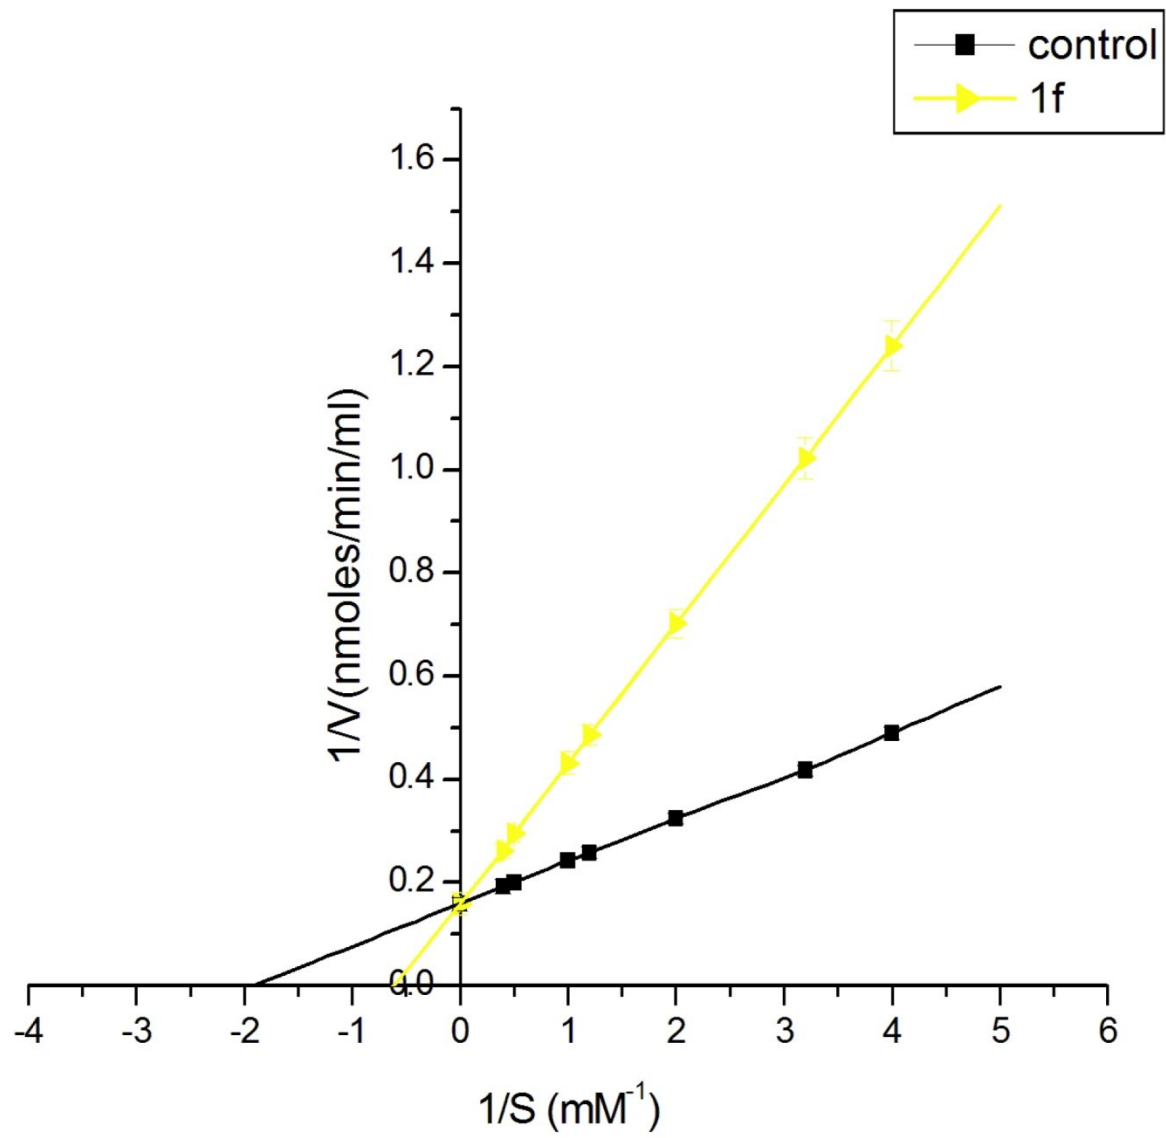

Figure H6

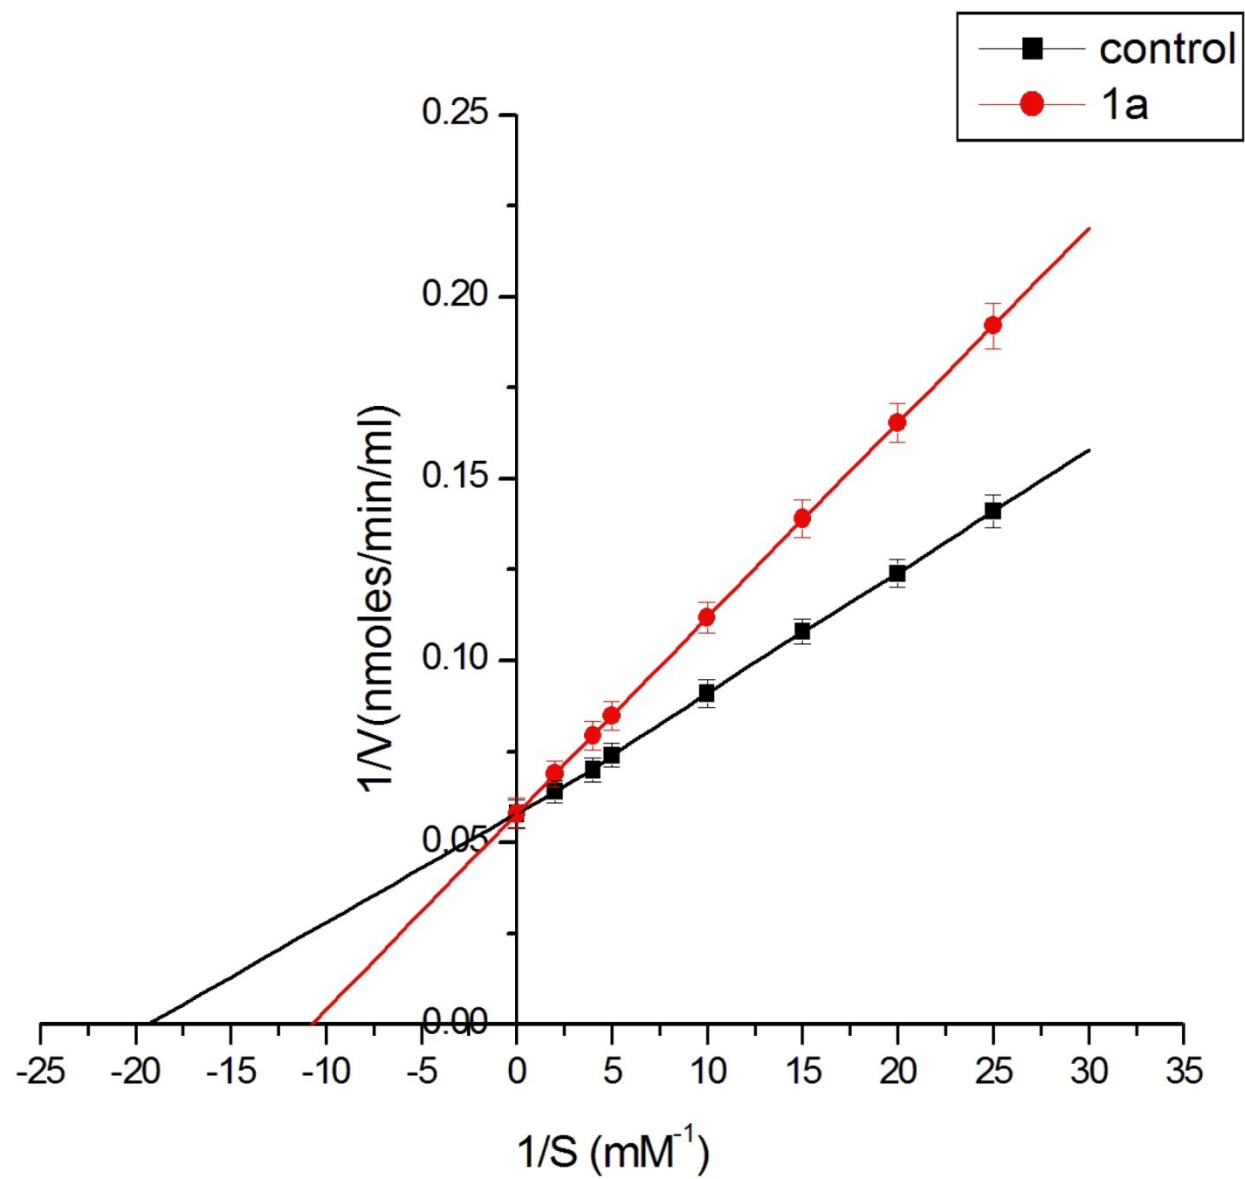

Figure L1



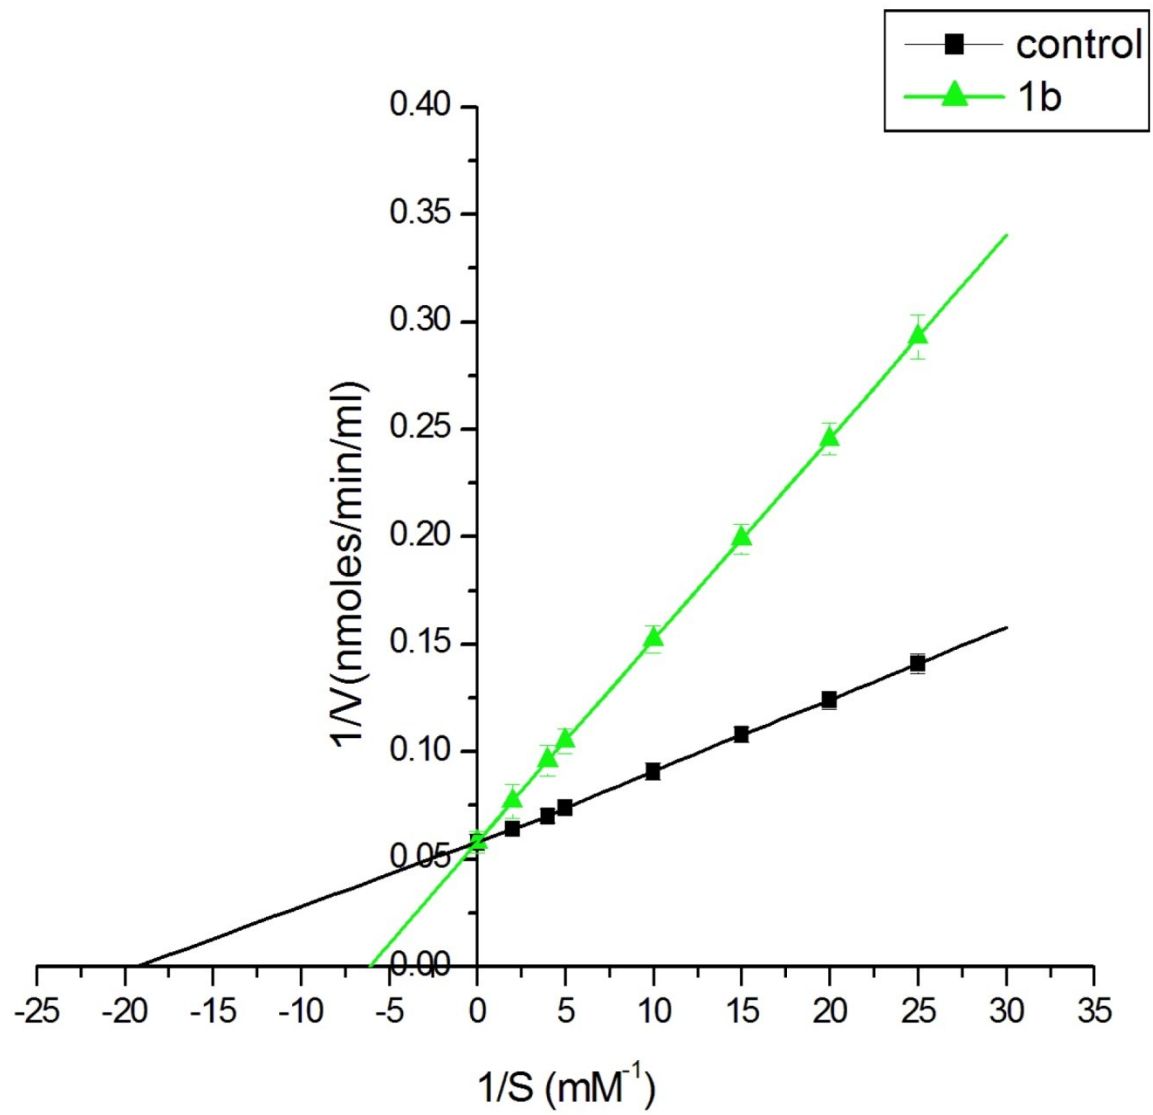

Figure L2

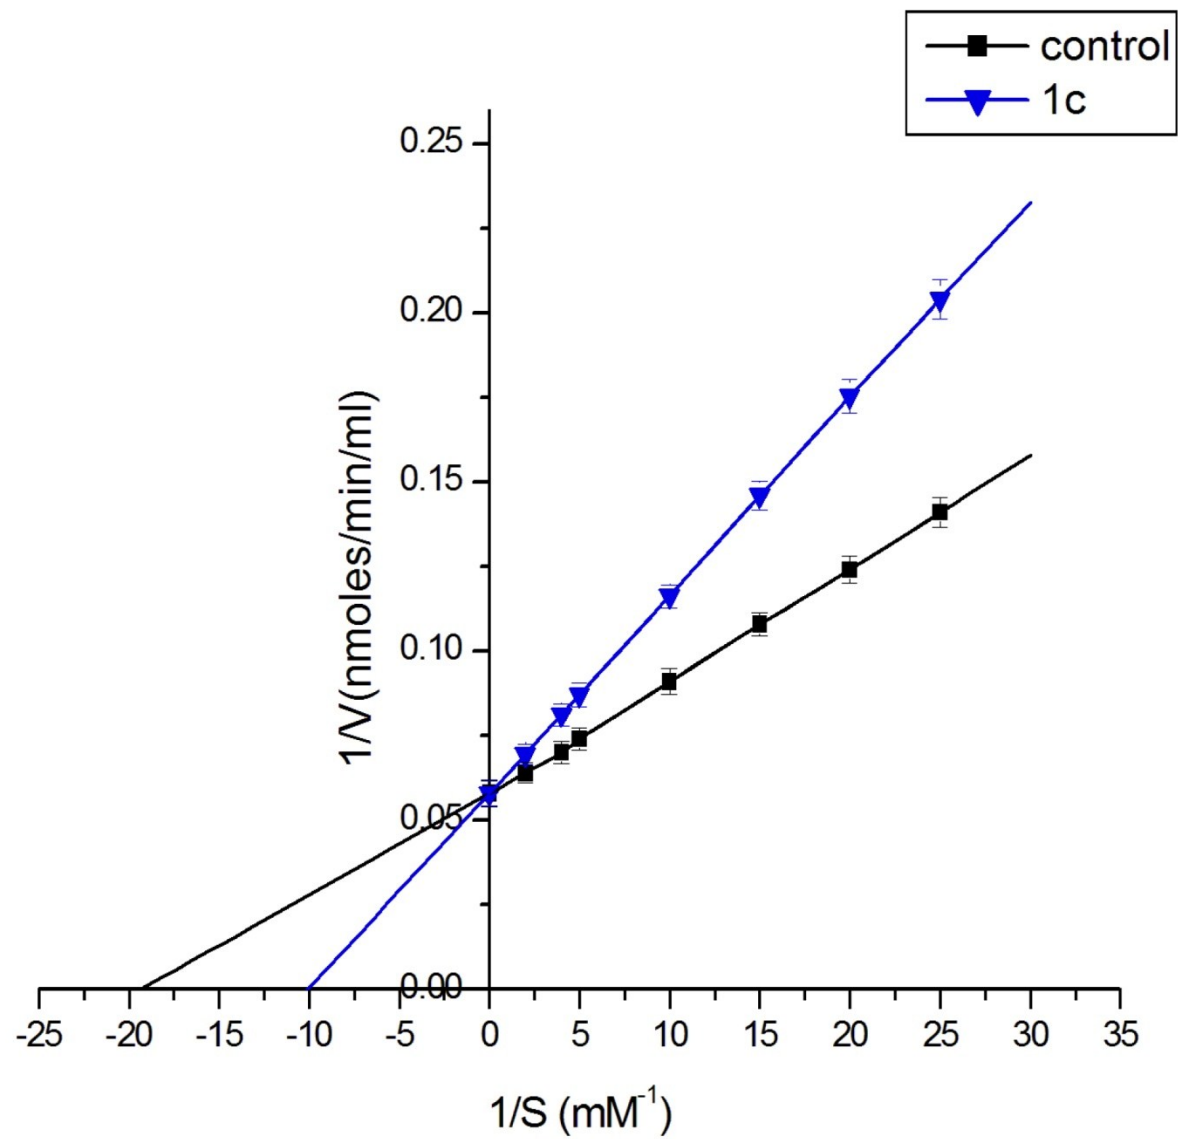

Figure L3

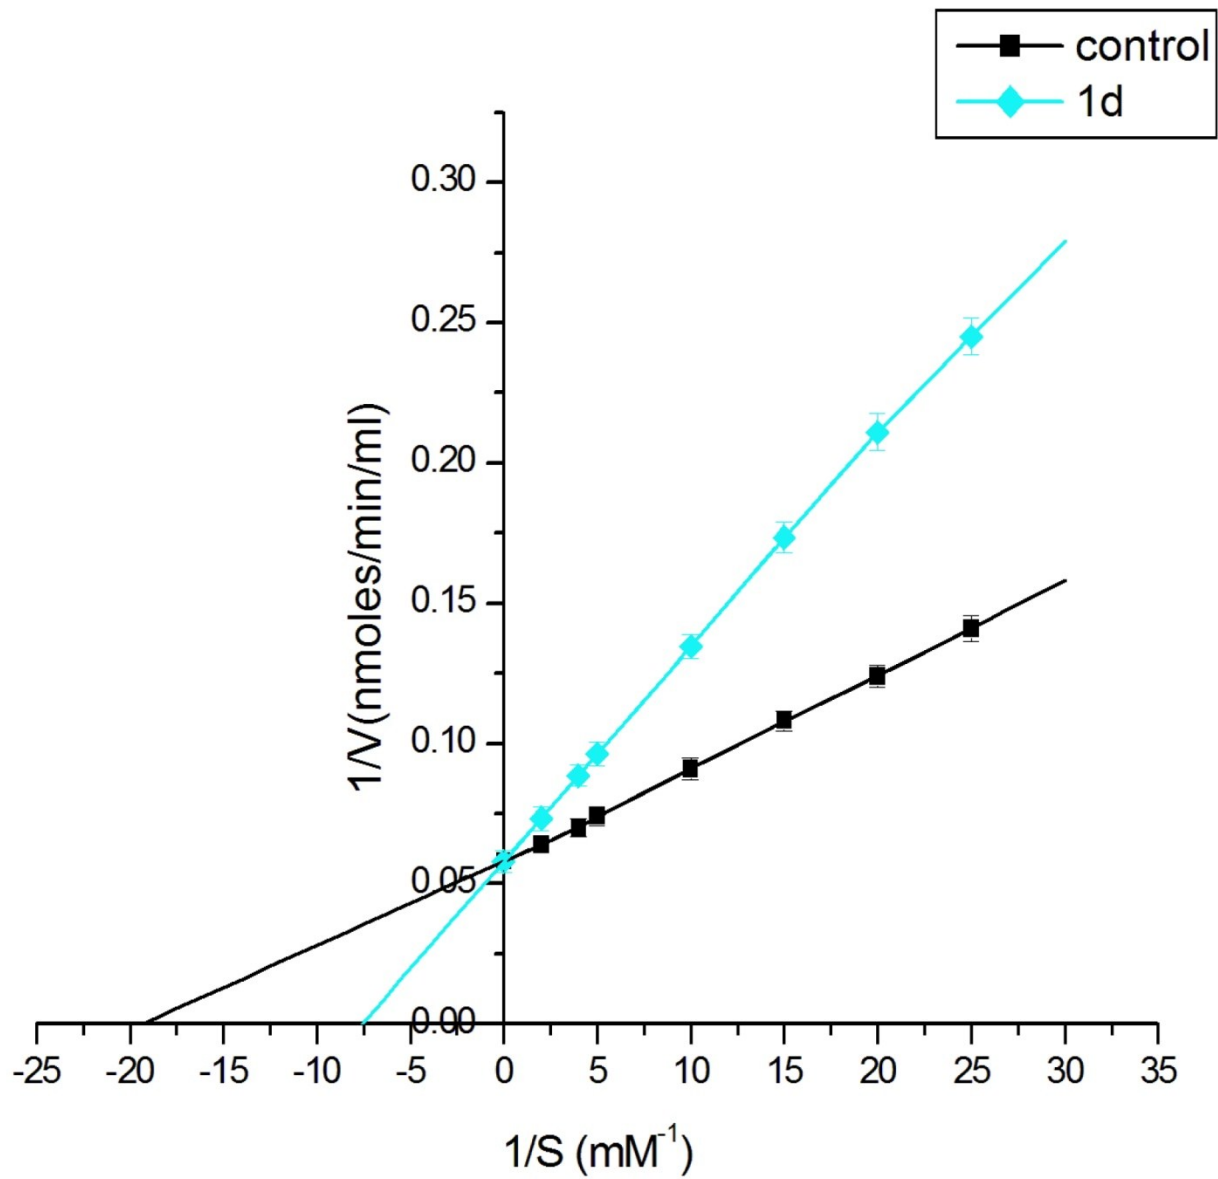

Figure L4

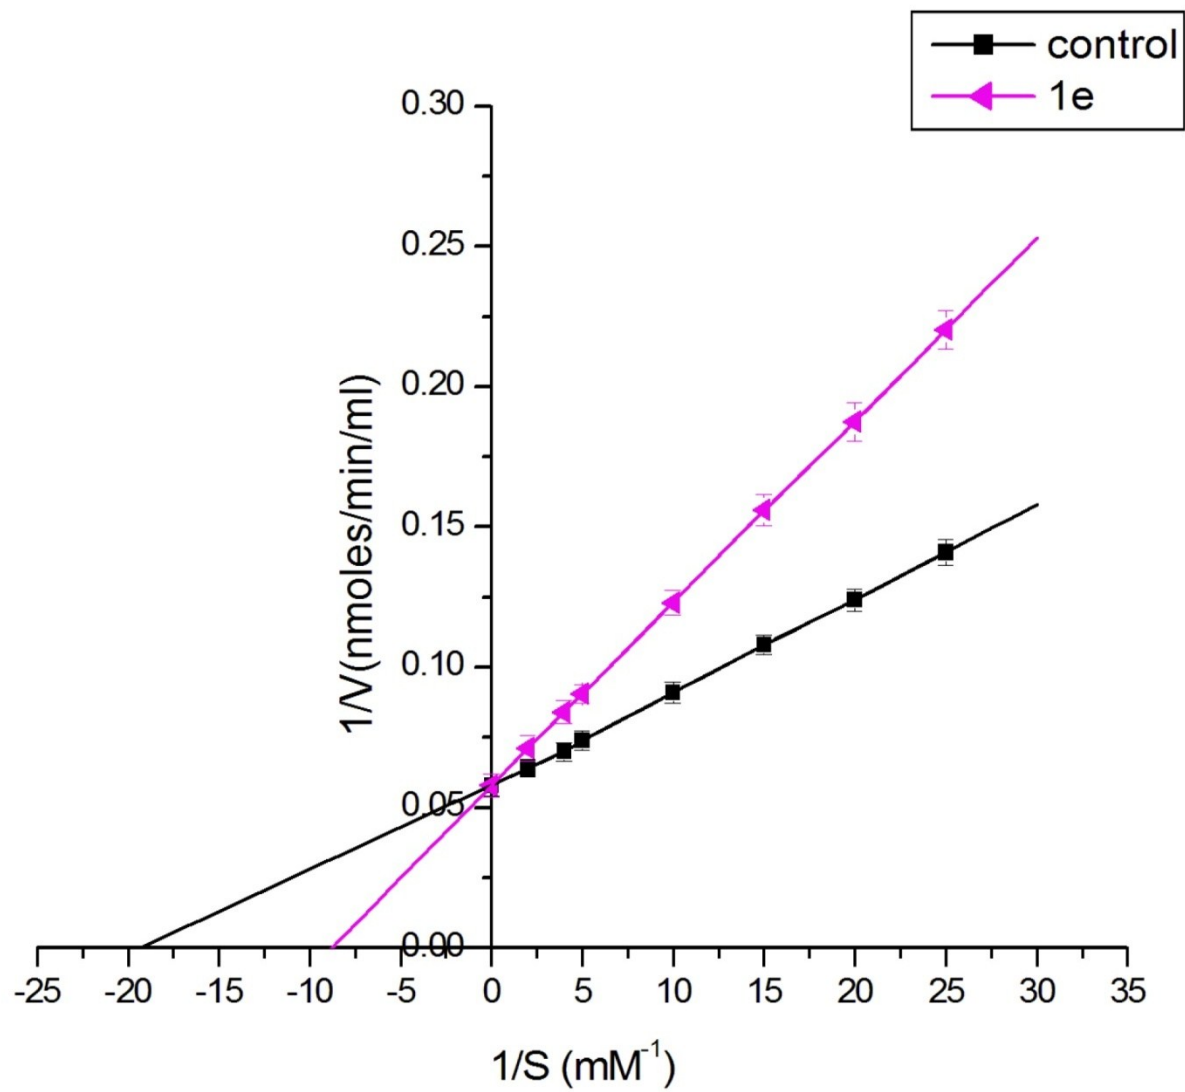

Figure L5

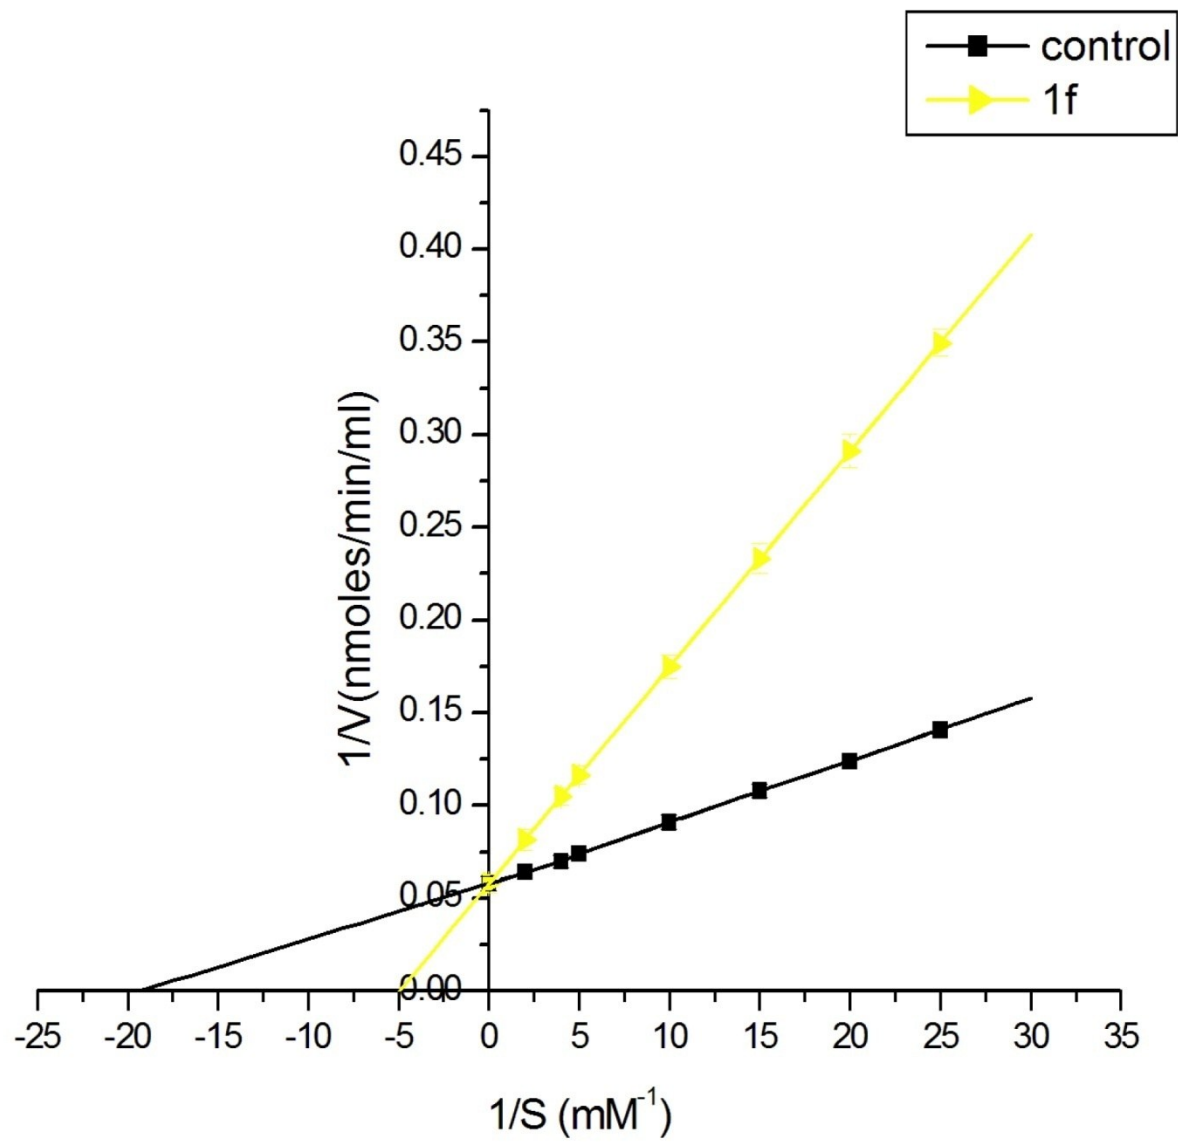

Figure L6

**Figure B1-B6:** Line weaver Burk plots in presence and absence of the synthesized compounds **1a-1f** (at a concentration  $I = 1 \times 10^{-6}$  M) on cathepsin B respectively

**Figure H1-H6:** Line weaver Burk plots in presence and absence of the synthesized compounds **1a-1f** (at a concentration  $I = 1 \times 10^{-7}$  M) on cathepsin H respectively.

**Figure L1-L6:** Line weaver Burk plots in presence and absence of the synthesized compounds **1a-1f** (at a concentration  $I = 1 \times 10^{-9}$  M) on cathepsin L respectively.
